# Supplementary material
Source: publisher figshare collection journal article supplement (https://geolsoc.figshare.com/ndownloader/files/22643027)
Supplement: Supplementary file 1 [file 22643027]

## Sheet: PlotDat2
Source sheet	U-Pb plot data	0.3	37.3803	1	36.8	0.4
Plot name	Average2	18.7	37.3803	2	36.8	0.5
Plot Type	15			3	36.8	0.3
1st free col	8			4	37	0.3
Sigma Level	1			5	37.1	0.3
Absolute Errs	TRUE			6	37.1	0.2
Symbol Type	1			7	37.1	0.3
Inverse Plot	FALSE			8	37.2	0.3
Color Plot	TRUE			9	37.2	0.3
3D plot	FALSE			10	37.3	0.3
Linear	FALSE			11	37.3	0.3
Data Range	AE31:AF48			12	37.6	0.3
Filled Symbols	FALSE			13	37.7	0.3
ConcAge	FALSE			14	37.9	0.3
ConcSwap	FALSE			15	38	0.4
1st Symbol-row	1			16	38	0.3
				17	38.1	0.3
				18	38.2	0.4
				IsoLine	IsoLine	IsoLine	IsoLine

## Sheet: PlotDat3
Source sheet	U-Pb plot data	174.825	0.04605	183.925	0.0467826	178.802	0.0468021	173.956	0.0468217	169.365	0.0468412	165.01	0.0468608	160.872	0.0468804	160	0.0468221	160	0.0467395	160	0.0469048	189.101	0.0467017	171.838	0.075	178.993	0.04605	171.373	0.04605	177.75	0.04744	174.824	0.04778	171.08	0.04796	175.585	0.04827	174.215	0.04844	172.556	0.05011	170.635	0.05089	172.711	0.05206	176.204	0.0524	174.361	0.05322
Plot name	Concordia3	169.205	0.04605	183.915	0.0468024	178.793	0.0468219	173.947	0.0468415	169.356	0.0468611	165.001	0.0468807	160.863	0.0469003	160	0.0468221	160	0.0467395	160	0.0469048	183.684	0.0467212	171.871	0.04	178.936	0.0464664	171.326	0.0463587	177.706	0.0479063	174.8	0.0480867	171.051	0.0483839	175.554	0.048669	174.191	0.0488365	172.526	0.0505688	170.6	0.0513164	172.687	0.0525163	176.173	0.0527815	174.33	0.0536015
Plot Type	1	174.52	0.04744	183.887	0.0468156	178.765	0.0468352	173.92	0.0468548	169.33	0.0468744	164.975	0.046894	160.838	0.0469136	160.723	0.0468186	160.723	0.046736	160.723	0.0469012	178.568	0.0467407			178.767	0.0468715	171.186	0.0466539	177.575	0.0483599	174.726	0.0483851	170.963	0.0487963	175.462	0.0490571	174.118	0.0492221	172.437	0.0510151	170.496	0.0517312	172.615	0.0529602	176.08	0.0531526	174.239	0.0539726
1st free col	59	173.01	0.04778	183.842	0.0468212	178.721	0.0468408	173.877	0.0468604	169.288	0.04688	164.935	0.0468996	160.799	0.0469192	161.453	0.0468151	161.453	0.0467325	161.453	0.0468977	173.728	0.0467603			178.49	0.0472542	170.959	0.0469227	177.361	0.0487884	174.606	0.0486669	170.82	0.0491858	175.311	0.0494237	173.998	0.0495865	172.291	0.0514367	170.325	0.052123	172.497	0.0533795	175.928	0.0535032	174.091	0.0543232
Sigma Level	1	168.919	0.04796	183.784	0.0468187	178.665	0.0468382	173.823	0.0468579	169.235	0.0468775	164.883	0.0468971	160.749	0.0469168	162.189	0.0468116	162.189	0.046729	162.189	0.0468942	169.143	0.0467798			178.114	0.047604	170.656	0.0471533	177.069	0.0491801	174.442	0.0489245	170.625	0.0495419	175.106	0.0497588	173.835	0.0499195	172.093	0.0518222	170.093	0.0524812	172.338	0.0537629	175.721	0.0538237	173.888	0.0546437
Absolute Errs	FALSE	173.31	0.04827	183.718	0.0468082	178.601	0.0468278	173.76	0.0468474	169.175	0.0468671	164.824	0.0468867	160.691	0.0469063	162.932	0.046808	162.932	0.0467254	162.932	0.0468906	164.793	0.0467993			177.648	0.0479114	170.289	0.0473358	176.708	0.0495243	174.239	0.049151	170.383	0.0498548	174.851	0.0500534	173.634	0.0502122	171.847	0.0521609	169.806	0.052796	172.139	0.0540997	175.465	0.0541054	173.637	0.0549254
Symbol Type	1	172.414	0.04844	183.649	0.0467908	178.534	0.0468104	173.695	0.04683	169.111	0.0468496	164.762	0.0468692	160.631	0.0468888	163.682	0.0468045	163.682	0.0467219	163.682	0.0468871	160.661	0.0468189			177.104	0.0481681	169.875	0.047462	176.287	0.0498117	174.002	0.04934	170.101	0.0501161	174.555	0.0502993	173.399	0.0504566	171.56	0.0524437	169.472	0.0530588	171.909	0.054381	175.166	0.0543405	173.344	0.0551605
Inverse Plot	TRUE	170.358	0.05011	183.584	0.0467677	178.47	0.0467873	173.633	0.0468068	169.051	0.0468264	164.703	0.046846	160.573	0.0468657	164.439	0.046801	164.439	0.0467184	164.439	0.0468835	IsoLine	IsoLine			176.499	0.0483669	169.431	0.0475266	175.818	0.0500344	173.739	0.0494865	169.787	0.0503186	174.224	0.0504898	173.137	0.0506459	171.241	0.0526628	169.099	0.0532624	171.651	0.0545989	174.833	0.0545227	173.018	0.0553427
Color Plot	TRUE	168.067	0.05089	183.526	0.0467408	178.414	0.0467604	173.578	0.0467799	168.997	0.0467995	164.651	0.0468191	160.523	0.0468387	165.203	0.0467975	165.203	0.0467149	165.203	0.04688					175.848	0.0485026	168.978	0.0475266	175.313	0.0501863	173.456	0.0495864	169.45	0.0504567	173.869	0.0506198	172.856	0.0507751	170.897	0.0528123	168.698	0.0534014	171.375	0.0547476	174.475	0.054647	172.668	0.055467
3D plot	FALSE	170.94	0.05206	183.481	0.0467124	178.37	0.0467319	173.536	0.0467514	168.956	0.046771	164.611	0.0467906	160.483	0.0468101	165.974	0.0467939	165.974	0.0467114	165.974	0.0468765					175.169	0.0485714	168.535	0.047462	174.787	0.0502633	173.16	0.0496371	169.097	0.0505267	173.498	0.0506857	172.563	0.0508406	170.539	0.0528881	168.279	0.0534718	171.086	0.054823	174.102	0.05471	172.302	0.05553
Linear	FALSE	173.913	0.0524	183.452	0.0466846	178.343	0.0467041	173.509	0.0467237	168.93	0.0467432	164.585	0.0467627	160.458	0.0467823	166.752	0.0467904	166.752	0.0467079	166.752	0.0468729					174.481	0.0485714	168.12	0.0473358	174.253	0.0502633	172.861	0.0496371	168.74	0.0505267	173.122	0.0506857	172.265	0.0508406	170.176	0.0528881	167.855	0.0534718	170.794	0.054823	173.724	0.05471	171.932	0.05553
Data Range	W31:Z46	172.117	0.05322	183.443	0.0466599	178.333	0.0466793	173.5	0.0466988	168.921	0.0467184	164.577	0.0467379	160.45	0.0467574	167.537	0.0467869	167.537	0.0467044	167.537	0.0468694					173.802	0.0485026	167.754	0.0471533	173.727	0.0501863	172.565	0.0495864	168.388	0.0504567	172.752	0.0506198	171.972	0.0507751	169.818	0.0528123	167.437	0.0534014	170.505	0.0547476	173.351	0.054647	171.566	0.055467
Filled Symbols	FALSE	169.205	0.05526	183.452	0.0466401	178.343	0.0466595	173.509	0.046679	168.93	0.0466985	164.585	0.046718	160.458	0.0467375	168.33	0.0467834	168.33	0.0467009	168.33	0.0468659					173.151	0.0483669	167.45	0.0469227	173.223	0.0500344	172.282	0.0494865	168.051	0.0503186	172.396	0.0504898	171.69	0.0506459	169.475	0.0526628	167.036	0.0532624	170.229	0.0545989	172.993	0.0545227	171.216	0.0553427
ConcAge	FALSE	169.492	0.06031	183.481	0.0466268	178.37	0.0466463	173.536	0.0466657	168.956	0.0466852	164.611	0.0467047	160.483	0.0467242	169.131	0.0467798	169.131	0.0466974	169.131	0.0468623					172.546	0.0481681	167.224	0.0466539	172.753	0.0498117	172.018	0.04934	167.737	0.0501161	172.066	0.0502993	171.429	0.0504566	169.155	0.0524437	166.663	0.0530588	169.972	0.054381	172.66	0.0543405	170.89	0.0551605
ConcSwap	FALSE	173.31	0.06168	183.526	0.0466212	178.414	0.0466407	173.578	0.0466601	168.997	0.0466796	164.651	0.0466991	160.523	0.0467186	169.939	0.0467763	169.939	0.0466939	169.939	0.0468588					172.003	0.0479114	167.083	0.0463587	172.332	0.0495243	171.782	0.049151	167.455	0.0498548	171.769	0.0500534	171.194	0.0502122	168.869	0.0521609	166.328	0.052796	169.741	0.0540997	172.361	0.0541054	170.597	0.0549254
1st Symbol-row	1	172.712	0.06308	183.584	0.0466238	178.47	0.0466432	173.633	0.0466626	169.051	0.0466821	164.703	0.0467016	160.573	0.0467211	170.754	0.0467728	170.754	0.0466904	170.754	0.0468553					171.537	0.047604	167.036	0.04605	171.971	0.0491801	171.579	0.0489245	167.213	0.0495419	171.515	0.0497588	170.992	0.0499195	168.623	0.0518222	166.041	0.0524812	169.543	0.0537629	172.105	0.0538237	170.346	0.0546437
		IsoLine	IsoLine	183.649	0.0466342	178.534	0.0466536	173.695	0.0466731	169.111	0.0466925	164.762	0.046712	160.631	0.0467315	171.578	0.0467693	171.578	0.0466868	171.578	0.0468517					171.16	0.0472542	167.083	0.0457413	171.679	0.0487884	171.415	0.0486669	167.018	0.0491858	171.309	0.0494237	170.829	0.0495865	168.424	0.0514367	165.809	0.052123	169.383	0.0533795	171.898	0.0535032	170.143	0.0543232
				183.718	0.0466516	178.601	0.0466711	173.76	0.0466905	169.175	0.04671	164.824	0.0467295	160.691	0.046749	172.41	0.0467658	172.41	0.0466833	172.41	0.0468482					170.884	0.0468715	167.224	0.0454461	171.465	0.0483599	171.295	0.0483851	166.875	0.0487963	171.158	0.0490571	170.71	0.0492221	168.278	0.0510151	165.639	0.0517312	169.265	0.0529602	171.746	0.0531526	169.995	0.0539726
				183.784	0.0466747	178.665	0.0466942	173.823	0.0467137	169.235	0.0467332	164.883	0.0467527	160.749	0.0467722	173.249	0.0467622	173.249	0.0466798	173.249	0.0468447					170.715	0.0464664	167.45	0.0451773	171.334	0.0479063	171.221	0.0480867	166.787	0.0483839	171.066	0.048669	170.637	0.0488365	168.189	0.0505688	165.535	0.0513164	169.194	0.0525163	171.653	0.0527815	169.904	0.0536015
				183.842	0.0467016	178.721	0.0467211	173.877	0.0467406	169.288	0.0467601	164.935	0.0467796	160.799	0.0467991	174.097	0.0467587	174.097	0.0466763	174.097	0.0468411					170.658	0.04605	167.754	0.0449467	171.29	0.04744	171.196	0.04778	166.758	0.04796	171.035	0.04827	170.612	0.04844	168.159	0.05011	165.5	0.05089	169.169	0.05206	171.622	0.0524	169.873	0.05322
				183.887	0.04673	178.765	0.0467495	173.92	0.0467691	169.33	0.0467886	164.975	0.0468081	160.838	0.0468277	174.953	0.0467552	174.953	0.0466728	174.953	0.0468376					170.715	0.0456336	168.12	0.0447642	171.334	0.0469737	171.221	0.0474733	166.787	0.0475361	171.066	0.047871	170.637	0.0480435	168.189	0.0496512	165.535	0.0504636	169.194	0.0516037	171.653	0.0520185	169.904	0.0528385
				183.915	0.0467578	178.793	0.0467773	173.947	0.0467968	169.356	0.0468164	165.001	0.046836	160.863	0.0468555	175.818	0.0467517	175.818	0.0466693	175.818	0.0468341					170.884	0.0452285	168.535	0.044638	171.465	0.0465201	171.295	0.0471749	166.875	0.0471237	171.158	0.0474829	170.71	0.0476579	168.278	0.0492049	165.639	0.0500488	169.265	0.0511598	171.746	0.0516474	169.995	0.0524674
				183.925	0.0467826	178.802	0.0468021	173.956	0.0468217	169.365	0.0468412	165.01	0.0468608	160.872	0.0468804	176.691	0.0467482	176.691	0.0466658	176.691	0.0468305					171.16	0.0448458	168.978	0.0445734	171.679	0.0460916	171.415	0.0468931	167.018	0.0467342	171.309	0.0471163	170.829	0.0472935	168.424	0.0487833	165.809	0.049657	169.383	0.0507405	171.898	0.0512968	170.143	0.0521168
				ConcTikEll	ConcTikEll	ConcTikEll	ConcTikEll	ConcTikEll	ConcTikEll	ConcTikEll	ConcTikEll	ConcTikEll	ConcTikEll	ConcTikEll	ConcTikEll	177.573	0.0467446	177.573	0.0466623	177.573	0.046827					171.537	0.044496	169.431	0.0445734	171.971	0.0456999	171.579	0.0466355	167.213	0.0463781	171.515	0.0467812	170.992	0.0469605	168.623	0.0483978	166.041	0.0492988	169.543	0.0503571	172.105	0.0509763	170.346	0.0517963
																178.463	0.0467411	178.463	0.0466588	178.463	0.0468235					172.003	0.0441886	169.875	0.044638	172.332	0.0453557	171.782	0.046409	167.455	0.0460652	171.769	0.0464866	171.194	0.0466678	168.869	0.0480591	166.328	0.048984	169.741	0.0500203	172.361	0.0506946	170.597	0.0515146
																179.363	0.0467376	179.363	0.0466553	179.363	0.0468199					172.546	0.0439319	170.289	0.0447642	172.753	0.0450683	172.018	0.04622	167.737	0.0458039	172.066	0.0462407	171.429	0.0464234	169.155	0.0477763	166.663	0.0487212	169.972	0.049739	172.66	0.0504595	170.89	0.0512795
																180.272	0.0467341	180.272	0.0466518	180.272	0.0468164					173.151	0.0437331	170.656	0.0449467	173.223	0.0448456	172.282	0.0460735	168.051	0.0456014	172.396	0.0460502	171.69	0.0462341	169.475	0.0475572	167.036	0.0485176	170.229	0.0495211	172.993	0.0502773	171.216	0.0510973
																181.189	0.0467306	181.189	0.0466483	181.189	0.0468129					173.802	0.0435974	170.959	0.0451773	173.727	0.0446937	172.565	0.0459736	168.388	0.0454633	172.752	0.0459202	171.972	0.0461049	169.818	0.0474077	167.437	0.0483786	170.505	0.0493724	173.351	0.050153	171.566	0.050973
																182.117	0.0467271	182.117	0.0466448	182.117	0.0468093					174.481	0.0435286	171.186	0.0454461	174.253	0.0446167	172.861	0.0459229	168.74	0.0453933	173.122	0.0458543	172.265	0.0460394	170.176	0.0473319	167.855	0.0483082	170.794	0.049297	173.724	0.05009	171.932	0.05091
																183.054	0.0467235	183.054	0.0466413	183.054	0.0468058					175.169	0.0435286	171.326	0.0457413	174.787	0.0446167	173.16	0.0459229	169.097	0.0453933	173.498	0.0458543	172.563	0.0460394	170.539	0.0473319	168.279	0.0483082	171.086	0.049297	174.102	0.05009	172.302	0.05091
																184	0.04672	184	0.0466378	184	0.0468023					175.848	0.0435974	171.373	0.04605	175.313	0.0446937	173.456	0.0459736	169.45	0.0454633	173.869	0.0459202	172.856	0.0461049	170.897	0.0474077	168.698	0.0483786	171.375	0.0493724	174.475	0.050153	172.668	0.050973
																184	0.04672	184	0.0466378	184	0.0468023					176.499	0.0437331			175.818	0.0448456	173.739	0.0460735	169.787	0.0456014	174.224	0.0460502	173.137	0.0462341	171.241	0.0475572	169.099	0.0485176	171.651	0.0495211	174.833	0.0502773	173.018	0.0510973
																IsoLine	IsoLine	ConcBand	ConcBand	ConcBand	ConcBand					177.104	0.0439319			176.287	0.0450683	174.002	0.04622	170.101	0.0458039	174.555	0.0462407	173.399	0.0464234	171.56	0.0477763	169.472	0.0487212	171.909	0.049739	175.166	0.0504595	173.344	0.0512795
																										177.648	0.0441886			176.708	0.0453557	174.239	0.046409	170.383	0.0460652	174.851	0.0464866	173.634	0.0466678	171.847	0.0480591	169.806	0.048984	172.139	0.0500203	175.465	0.0506946	173.637	0.0515146
																										178.114	0.044496			177.069	0.0456999	174.442	0.0466355	170.625	0.0463781	175.106	0.0467812	173.835	0.0469605	172.093	0.0483978	170.093	0.0492988	172.338	0.0503571	175.721	0.0509763	173.888	0.0517963
																										178.49	0.0448458			177.361	0.0460916	174.606	0.0468931	170.82	0.0467342	175.311	0.0471163	173.998	0.0472935	172.291	0.0487833	170.325	0.049657	172.497	0.0507405	175.928	0.0512968	174.091	0.0521168
																										178.767	0.0452285			177.575	0.0465201	174.726	0.0471749	170.963	0.0471237	175.462	0.0474829	174.118	0.0476579	172.437	0.0492049	170.496	0.0500488	172.615	0.0511598	176.08	0.0516474	174.239	0.0524674
																										178.936	0.0456336			177.706	0.0469737	174.8	0.0474733	171.051	0.0475361	175.554	0.047871	174.191	0.0480435	172.526	0.0496512	170.6	0.0504636	172.687	0.0516037	176.173	0.0520185	174.33	0.0528385
																										178.993	0.04605			177.75	0.04744	174.824	0.04778	171.08	0.04796	175.585	0.04827	174.215	0.04844	172.556	0.05011	170.635	0.05089	172.711	0.05206	176.204	0.0524	174.361	0.05322
[truncated: 10 more columns]

## Sheet: PlotDat7
Source sheet	U-Pb plot data	174.825	0.04605	183.925	0.0467826	178.802	0.0468021	173.956	0.0468217	169.365	0.0468412	165.01	0.0468608	160.872	0.0468804	160	0.0468221	160	0.0467395	160	0.0469048	189.101	0.0467017	169.414	0.075	178.993	0.04605	171.373	0.04605	177.75	0.04744	174.824	0.04778	171.08	0.04796	175.585	0.04827	174.215	0.04844	172.556	0.05011	170.635	0.05089	172.711	0.05206	176.204	0.0524	174.361	0.05322
Plot name	Concordia7	169.205	0.04605	183.915	0.0468024	178.793	0.0468219	173.947	0.0468415	169.356	0.0468611	165.001	0.0468807	160.863	0.0469003	160	0.0468221	160	0.0467395	160	0.0469048	183.684	0.0467212	174.179	0.04	178.936	0.0464664	171.326	0.0463587	177.706	0.0479063	174.8	0.0480867	171.051	0.0483839	175.554	0.048669	174.191	0.0488365	172.526	0.0505688	170.6	0.0513164	172.687	0.0525163	176.173	0.0527815	174.33	0.0536015
Plot Type	1	174.52	0.04744	183.887	0.0468156	178.765	0.0468352	173.92	0.0468548	169.33	0.0468744	164.975	0.046894	160.838	0.0469136	160.723	0.0468186	160.723	0.046736	160.723	0.0469012	178.568	0.0467407			178.767	0.0468715	171.186	0.0466539	177.575	0.0483599	174.726	0.0483851	170.963	0.0487963	175.462	0.0490571	174.118	0.0492221	172.437	0.0510151	170.496	0.0517312	172.615	0.0529602	176.08	0.0531526	174.239	0.0539726
1st free col	59	173.01	0.04778	183.842	0.0468212	178.721	0.0468408	173.877	0.0468604	169.288	0.04688	164.935	0.0468996	160.799	0.0469192	161.453	0.0468151	161.453	0.0467325	161.453	0.0468977	173.728	0.0467603			178.49	0.0472542	170.959	0.0469227	177.361	0.0487884	174.606	0.0486669	170.82	0.0491858	175.311	0.0494237	173.998	0.0495865	172.291	0.0514367	170.325	0.052123	172.497	0.0533795	175.928	0.0535032	174.091	0.0543232
Sigma Level	1	168.919	0.04796	183.784	0.0468187	178.665	0.0468382	173.823	0.0468579	169.235	0.0468775	164.883	0.0468971	160.749	0.0469168	162.189	0.0468116	162.189	0.046729	162.189	0.0468942	169.143	0.0467798			178.114	0.047604	170.656	0.0471533	177.069	0.0491801	174.442	0.0489245	170.625	0.0495419	175.106	0.0497588	173.835	0.0499195	172.093	0.0518222	170.093	0.0524812	172.338	0.0537629	175.721	0.0538237	173.888	0.0546437
Absolute Errs	FALSE	173.31	0.04827	183.718	0.0468082	178.601	0.0468278	173.76	0.0468474	169.175	0.0468671	164.824	0.0468867	160.691	0.0469063	162.932	0.046808	162.932	0.0467254	162.932	0.0468906	164.793	0.0467993			177.648	0.0479114	170.289	0.0473358	176.708	0.0495243	174.239	0.049151	170.383	0.0498548	174.851	0.0500534	173.634	0.0502122	171.847	0.0521609	169.806	0.052796	172.139	0.0540997	175.465	0.0541054	173.637	0.0549254
Symbol Type	1	172.414	0.04844	183.649	0.0467908	178.534	0.0468104	173.695	0.04683	169.111	0.0468496	164.762	0.0468692	160.631	0.0468888	163.682	0.0468045	163.682	0.0467219	163.682	0.0468871	160.661	0.0468189			177.104	0.0481681	169.875	0.047462	176.287	0.0498117	174.002	0.04934	170.101	0.0501161	174.555	0.0502993	173.399	0.0504566	171.56	0.0524437	169.472	0.0530588	171.909	0.054381	175.166	0.0543405	173.344	0.0551605
Inverse Plot	TRUE	170.358	0.05011	183.584	0.0467677	178.47	0.0467873	173.633	0.0468068	169.051	0.0468264	164.703	0.046846	160.573	0.0468657	164.439	0.046801	164.439	0.0467184	164.439	0.0468835	IsoLine	IsoLine			176.499	0.0483669	169.431	0.0475266	175.818	0.0500344	173.739	0.0494865	169.787	0.0503186	174.224	0.0504898	173.137	0.0506459	171.241	0.0526628	169.099	0.0532624	171.651	0.0545989	174.833	0.0545227	173.018	0.0553427
Color Plot	TRUE	168.067	0.05089	183.526	0.0467408	178.414	0.0467604	173.578	0.0467799	168.997	0.0467995	164.651	0.0468191	160.523	0.0468387	165.203	0.0467975	165.203	0.0467149	165.203	0.04688					175.848	0.0485026	168.978	0.0475266	175.313	0.0501863	173.456	0.0495864	169.45	0.0504567	173.869	0.0506198	172.856	0.0507751	170.897	0.0528123	168.698	0.0534014	171.375	0.0547476	174.475	0.054647	172.668	0.055467
3D plot	FALSE	170.94	0.05206	183.481	0.0467124	178.37	0.0467319	173.536	0.0467514	168.956	0.046771	164.611	0.0467906	160.483	0.0468101	165.974	0.0467939	165.974	0.0467114	165.974	0.0468765					175.169	0.0485714	168.535	0.047462	174.787	0.0502633	173.16	0.0496371	169.097	0.0505267	173.498	0.0506857	172.563	0.0508406	170.539	0.0528881	168.279	0.0534718	171.086	0.054823	174.102	0.05471	172.302	0.05553
Linear	FALSE	173.913	0.0524	183.452	0.0466846	178.343	0.0467041	173.509	0.0467237	168.93	0.0467432	164.585	0.0467627	160.458	0.0467823	166.752	0.0467904	166.752	0.0467079	166.752	0.0468729					174.481	0.0485714	168.12	0.0473358	174.253	0.0502633	172.861	0.0496371	168.74	0.0505267	173.122	0.0506857	172.265	0.0508406	170.176	0.0528881	167.855	0.0534718	170.794	0.054823	173.724	0.05471	171.932	0.05553
Data Range	W31:Z46	172.117	0.05322	183.443	0.0466599	178.333	0.0466793	173.5	0.0466988	168.921	0.0467184	164.577	0.0467379	160.45	0.0467574	167.537	0.0467869	167.537	0.0467044	167.537	0.0468694					173.802	0.0485026	167.754	0.0471533	173.727	0.0501863	172.565	0.0495864	168.388	0.0504567	172.752	0.0506198	171.972	0.0507751	169.818	0.0528123	167.437	0.0534014	170.505	0.0547476	173.351	0.054647	171.566	0.055467
Filled Symbols	FALSE	169.205	0.05526	183.452	0.0466401	178.343	0.0466595	173.509	0.046679	168.93	0.0466985	164.585	0.046718	160.458	0.0467375	168.33	0.0467834	168.33	0.0467009	168.33	0.0468659					173.151	0.0483669	167.45	0.0469227	173.223	0.0500344	172.282	0.0494865	168.051	0.0503186	172.396	0.0504898	171.69	0.0506459	169.475	0.0526628	167.036	0.0532624	170.229	0.0545989	172.993	0.0545227	171.216	0.0553427
ConcAge	FALSE	169.492	0.06031	183.481	0.0466268	178.37	0.0466463	173.536	0.0466657	168.956	0.0466852	164.611	0.0467047	160.483	0.0467242	169.131	0.0467798	169.131	0.0466974	169.131	0.0468623					172.546	0.0481681	167.224	0.0466539	172.753	0.0498117	172.018	0.04934	167.737	0.0501161	172.066	0.0502993	171.429	0.0504566	169.155	0.0524437	166.663	0.0530588	169.972	0.054381	172.66	0.0543405	170.89	0.0551605
ConcSwap	FALSE	173.31	0.06168	183.526	0.0466212	178.414	0.0466407	173.578	0.0466601	168.997	0.0466796	164.651	0.0466991	160.523	0.0467186	169.939	0.0467763	169.939	0.0466939	169.939	0.0468588					172.003	0.0479114	167.083	0.0463587	172.332	0.0495243	171.782	0.049151	167.455	0.0498548	171.769	0.0500534	171.194	0.0502122	168.869	0.0521609	166.328	0.052796	169.741	0.0540997	172.361	0.0541054	170.597	0.0549254
1st Symbol-row	1	172.712	0.06308	183.584	0.0466238	178.47	0.0466432	173.633	0.0466626	169.051	0.0466821	164.703	0.0467016	160.573	0.0467211	170.754	0.0467728	170.754	0.0466904	170.754	0.0468553					171.537	0.047604	167.036	0.04605	171.971	0.0491801	171.579	0.0489245	167.213	0.0495419	171.515	0.0497588	170.992	0.0499195	168.623	0.0518222	166.041	0.0524812	169.543	0.0537629	172.105	0.0538237	170.346	0.0546437
		IsoLine	IsoLine	183.649	0.0466342	178.534	0.0466536	173.695	0.0466731	169.111	0.0466925	164.762	0.046712	160.631	0.0467315	171.578	0.0467693	171.578	0.0466868	171.578	0.0468517					171.16	0.0472542	167.083	0.0457413	171.679	0.0487884	171.415	0.0486669	167.018	0.0491858	171.309	0.0494237	170.829	0.0495865	168.424	0.0514367	165.809	0.052123	169.383	0.0533795	171.898	0.0535032	170.143	0.0543232
				183.718	0.0466516	178.601	0.0466711	173.76	0.0466905	169.175	0.04671	164.824	0.0467295	160.691	0.046749	172.41	0.0467658	172.41	0.0466833	172.41	0.0468482					170.884	0.0468715	167.224	0.0454461	171.465	0.0483599	171.295	0.0483851	166.875	0.0487963	171.158	0.0490571	170.71	0.0492221	168.278	0.0510151	165.639	0.0517312	169.265	0.0529602	171.746	0.0531526	169.995	0.0539726
				183.784	0.0466747	178.665	0.0466942	173.823	0.0467137	169.235	0.0467332	164.883	0.0467527	160.749	0.0467722	173.249	0.0467622	173.249	0.0466798	173.249	0.0468447					170.715	0.0464664	167.45	0.0451773	171.334	0.0479063	171.221	0.0480867	166.787	0.0483839	171.066	0.048669	170.637	0.0488365	168.189	0.0505688	165.535	0.0513164	169.194	0.0525163	171.653	0.0527815	169.904	0.0536015
				183.842	0.0467016	178.721	0.0467211	173.877	0.0467406	169.288	0.0467601	164.935	0.0467796	160.799	0.0467991	174.097	0.0467587	174.097	0.0466763	174.097	0.0468411					170.658	0.04605	167.754	0.0449467	171.29	0.04744	171.196	0.04778	166.758	0.04796	171.035	0.04827	170.612	0.04844	168.159	0.05011	165.5	0.05089	169.169	0.05206	171.622	0.0524	169.873	0.05322
				183.887	0.04673	178.765	0.0467495	173.92	0.0467691	169.33	0.0467886	164.975	0.0468081	160.838	0.0468277	174.953	0.0467552	174.953	0.0466728	174.953	0.0468376					170.715	0.0456336	168.12	0.0447642	171.334	0.0469737	171.221	0.0474733	166.787	0.0475361	171.066	0.047871	170.637	0.0480435	168.189	0.0496512	165.535	0.0504636	169.194	0.0516037	171.653	0.0520185	169.904	0.0528385
				183.915	0.0467578	178.793	0.0467773	173.947	0.0467968	169.356	0.0468164	165.001	0.046836	160.863	0.0468555	175.818	0.0467517	175.818	0.0466693	175.818	0.0468341					170.884	0.0452285	168.535	0.044638	171.465	0.0465201	171.295	0.0471749	166.875	0.0471237	171.158	0.0474829	170.71	0.0476579	168.278	0.0492049	165.639	0.0500488	169.265	0.0511598	171.746	0.0516474	169.995	0.0524674
				183.925	0.0467826	178.802	0.0468021	173.956	0.0468217	169.365	0.0468412	165.01	0.0468608	160.872	0.0468804	176.691	0.0467482	176.691	0.0466658	176.691	0.0468305					171.16	0.0448458	168.978	0.0445734	171.679	0.0460916	171.415	0.0468931	167.018	0.0467342	171.309	0.0471163	170.829	0.0472935	168.424	0.0487833	165.809	0.049657	169.383	0.0507405	171.898	0.0512968	170.143	0.0521168
				ConcTikEll	ConcTikEll	ConcTikEll	ConcTikEll	ConcTikEll	ConcTikEll	ConcTikEll	ConcTikEll	ConcTikEll	ConcTikEll	ConcTikEll	ConcTikEll	177.573	0.0467446	177.573	0.0466623	177.573	0.046827					171.537	0.044496	169.431	0.0445734	171.971	0.0456999	171.579	0.0466355	167.213	0.0463781	171.515	0.0467812	170.992	0.0469605	168.623	0.0483978	166.041	0.0492988	169.543	0.0503571	172.105	0.0509763	170.346	0.0517963
																178.463	0.0467411	178.463	0.0466588	178.463	0.0468235					172.003	0.0441886	169.875	0.044638	172.332	0.0453557	171.782	0.046409	167.455	0.0460652	171.769	0.0464866	171.194	0.0466678	168.869	0.0480591	166.328	0.048984	169.741	0.0500203	172.361	0.0506946	170.597	0.0515146
																179.363	0.0467376	179.363	0.0466553	179.363	0.0468199					172.546	0.0439319	170.289	0.0447642	172.753	0.0450683	172.018	0.04622	167.737	0.0458039	172.066	0.0462407	171.429	0.0464234	169.155	0.0477763	166.663	0.0487212	169.972	0.049739	172.66	0.0504595	170.89	0.0512795
																180.272	0.0467341	180.272	0.0466518	180.272	0.0468164					173.151	0.0437331	170.656	0.0449467	173.223	0.0448456	172.282	0.0460735	168.051	0.0456014	172.396	0.0460502	171.69	0.0462341	169.475	0.0475572	167.036	0.0485176	170.229	0.0495211	172.993	0.0502773	171.216	0.0510973
																181.189	0.0467306	181.189	0.0466483	181.189	0.0468129					173.802	0.0435974	170.959	0.0451773	173.727	0.0446937	172.565	0.0459736	168.388	0.0454633	172.752	0.0459202	171.972	0.0461049	169.818	0.0474077	167.437	0.0483786	170.505	0.0493724	173.351	0.050153	171.566	0.050973
																182.117	0.0467271	182.117	0.0466448	182.117	0.0468093					174.481	0.0435286	171.186	0.0454461	174.253	0.0446167	172.861	0.0459229	168.74	0.0453933	173.122	0.0458543	172.265	0.0460394	170.176	0.0473319	167.855	0.0483082	170.794	0.049297	173.724	0.05009	171.932	0.05091
																183.054	0.0467235	183.054	0.0466413	183.054	0.0468058					175.169	0.0435286	171.326	0.0457413	174.787	0.0446167	173.16	0.0459229	169.097	0.0453933	173.498	0.0458543	172.563	0.0460394	170.539	0.0473319	168.279	0.0483082	171.086	0.049297	174.102	0.05009	172.302	0.05091
																184	0.04672	184	0.0466378	184	0.0468023					175.848	0.0435974	171.373	0.04605	175.313	0.0446937	173.456	0.0459736	169.45	0.0454633	173.869	0.0459202	172.856	0.0461049	170.897	0.0474077	168.698	0.0483786	171.375	0.0493724	174.475	0.050153	172.668	0.050973
																184	0.04672	184	0.0466378	184	0.0468023					176.499	0.0437331			175.818	0.0448456	173.739	0.0460735	169.787	0.0456014	174.224	0.0460502	173.137	0.0462341	171.241	0.0475572	169.099	0.0485176	171.651	0.0495211	174.833	0.0502773	173.018	0.0510973
																IsoLine	IsoLine	ConcBand	ConcBand	ConcBand	ConcBand					177.104	0.0439319			176.287	0.0450683	174.002	0.04622	170.101	0.0458039	174.555	0.0462407	173.399	0.0464234	171.56	0.0477763	169.472	0.0487212	171.909	0.049739	175.166	0.0504595	173.344	0.0512795
																										177.648	0.0441886			176.708	0.0453557	174.239	0.046409	170.383	0.0460652	174.851	0.0464866	173.634	0.0466678	171.847	0.0480591	169.806	0.048984	172.139	0.0500203	175.465	0.0506946	173.637	0.0515146
																										178.114	0.044496			177.069	0.0456999	174.442	0.0466355	170.625	0.0463781	175.106	0.0467812	173.835	0.0469605	172.093	0.0483978	170.093	0.0492988	172.338	0.0503571	175.721	0.0509763	173.888	0.0517963
																										178.49	0.0448458			177.361	0.0460916	174.606	0.0468931	170.82	0.0467342	175.311	0.0471163	173.998	0.0472935	172.291	0.0487833	170.325	0.049657	172.497	0.0507405	175.928	0.0512968	174.091	0.0521168
																										178.767	0.0452285			177.575	0.0465201	174.726	0.0471749	170.963	0.0471237	175.462	0.0474829	174.118	0.0476579	172.437	0.0492049	170.496	0.0500488	172.615	0.0511598	176.08	0.0516474	174.239	0.0524674
																										178.936	0.0456336			177.706	0.0469737	174.8	0.0474733	171.051	0.0475361	175.554	0.047871	174.191	0.0480435	172.526	0.0496512	170.6	0.0504636	172.687	0.0516037	176.173	0.0520185	174.33	0.0528385
																										178.993	0.04605			177.75	0.04744	174.824	0.04778	171.08	0.04796	175.585	0.04827	174.215	0.04844	172.556	0.05011	170.635	0.05089	172.711	0.05206	176.204	0.0524	174.361	0.05322
[truncated: 10 more columns]

## Sheet: PlotDat8
Source sheet	U-Pb plot data	174.825	0.04605	183.925	0.0467826	178.802	0.0468021	173.956	0.0468217	169.365	0.0468412	165.01	0.0468608	160.872	0.0468804	160	0.0468221	160	0.0467395	160	0.0469048	189.101	0.0467017	171.064	0.075	178.993	0.04605	171.373	0.04605	177.75	0.04744	174.824	0.04778	171.08	0.04796	175.585	0.04827	174.215	0.04844	172.556	0.05011	170.635	0.05089	172.711	0.05206	176.204	0.0524	174.361	0.05322
Plot name	Concordia8	169.205	0.04605	183.915	0.0468024	178.793	0.0468219	173.947	0.0468415	169.356	0.0468611	165.001	0.0468807	160.863	0.0469003	160	0.0468221	160	0.0467395	160	0.0469048	183.684	0.0467212	172.629	0.04	178.936	0.0464664	171.326	0.0463587	177.706	0.0479063	174.8	0.0480867	171.051	0.0483839	175.554	0.048669	174.191	0.0488365	172.526	0.0505688	170.6	0.0513164	172.687	0.0525163	176.173	0.0527815	174.33	0.0536015
Plot Type	1	174.52	0.04744	183.887	0.0468156	178.765	0.0468352	173.92	0.0468548	169.33	0.0468744	164.975	0.046894	160.838	0.0469136	160.723	0.0468186	160.723	0.046736	160.723	0.0469012	178.568	0.0467407			178.767	0.0468715	171.186	0.0466539	177.575	0.0483599	174.726	0.0483851	170.963	0.0487963	175.462	0.0490571	174.118	0.0492221	172.437	0.0510151	170.496	0.0517312	172.615	0.0529602	176.08	0.0531526	174.239	0.0539726
1st free col	59	173.01	0.04778	183.842	0.0468212	178.721	0.0468408	173.877	0.0468604	169.288	0.04688	164.935	0.0468996	160.799	0.0469192	161.453	0.0468151	161.453	0.0467325	161.453	0.0468977	173.728	0.0467603			178.49	0.0472542	170.959	0.0469227	177.361	0.0487884	174.606	0.0486669	170.82	0.0491858	175.311	0.0494237	173.998	0.0495865	172.291	0.0514367	170.325	0.052123	172.497	0.0533795	175.928	0.0535032	174.091	0.0543232
Sigma Level	1	168.919	0.04796	183.784	0.0468187	178.665	0.0468382	173.823	0.0468579	169.235	0.0468775	164.883	0.0468971	160.749	0.0469168	162.189	0.0468116	162.189	0.046729	162.189	0.0468942	169.143	0.0467798			178.114	0.047604	170.656	0.0471533	177.069	0.0491801	174.442	0.0489245	170.625	0.0495419	175.106	0.0497588	173.835	0.0499195	172.093	0.0518222	170.093	0.0524812	172.338	0.0537629	175.721	0.0538237	173.888	0.0546437
Absolute Errs	FALSE	173.31	0.04827	183.718	0.0468082	178.601	0.0468278	173.76	0.0468474	169.175	0.0468671	164.824	0.0468867	160.691	0.0469063	162.932	0.046808	162.932	0.0467254	162.932	0.0468906	164.793	0.0467993			177.648	0.0479114	170.289	0.0473358	176.708	0.0495243	174.239	0.049151	170.383	0.0498548	174.851	0.0500534	173.634	0.0502122	171.847	0.0521609	169.806	0.052796	172.139	0.0540997	175.465	0.0541054	173.637	0.0549254
Symbol Type	1	172.414	0.04844	183.649	0.0467908	178.534	0.0468104	173.695	0.04683	169.111	0.0468496	164.762	0.0468692	160.631	0.0468888	163.682	0.0468045	163.682	0.0467219	163.682	0.0468871	160.661	0.0468189			177.104	0.0481681	169.875	0.047462	176.287	0.0498117	174.002	0.04934	170.101	0.0501161	174.555	0.0502993	173.399	0.0504566	171.56	0.0524437	169.472	0.0530588	171.909	0.054381	175.166	0.0543405	173.344	0.0551605
Inverse Plot	TRUE	170.358	0.05011	183.584	0.0467677	178.47	0.0467873	173.633	0.0468068	169.051	0.0468264	164.703	0.046846	160.573	0.0468657	164.439	0.046801	164.439	0.0467184	164.439	0.0468835	IsoLine	IsoLine			176.499	0.0483669	169.431	0.0475266	175.818	0.0500344	173.739	0.0494865	169.787	0.0503186	174.224	0.0504898	173.137	0.0506459	171.241	0.0526628	169.099	0.0532624	171.651	0.0545989	174.833	0.0545227	173.018	0.0553427
Color Plot	TRUE	168.067	0.05089	183.526	0.0467408	178.414	0.0467604	173.578	0.0467799	168.997	0.0467995	164.651	0.0468191	160.523	0.0468387	165.203	0.0467975	165.203	0.0467149	165.203	0.04688					175.848	0.0485026	168.978	0.0475266	175.313	0.0501863	173.456	0.0495864	169.45	0.0504567	173.869	0.0506198	172.856	0.0507751	170.897	0.0528123	168.698	0.0534014	171.375	0.0547476	174.475	0.054647	172.668	0.055467
3D plot	FALSE	170.94	0.05206	183.481	0.0467124	178.37	0.0467319	173.536	0.0467514	168.956	0.046771	164.611	0.0467906	160.483	0.0468101	165.974	0.0467939	165.974	0.0467114	165.974	0.0468765					175.169	0.0485714	168.535	0.047462	174.787	0.0502633	173.16	0.0496371	169.097	0.0505267	173.498	0.0506857	172.563	0.0508406	170.539	0.0528881	168.279	0.0534718	171.086	0.054823	174.102	0.05471	172.302	0.05553
Linear	FALSE	173.913	0.0524	183.452	0.0466846	178.343	0.0467041	173.509	0.0467237	168.93	0.0467432	164.585	0.0467627	160.458	0.0467823	166.752	0.0467904	166.752	0.0467079	166.752	0.0468729					174.481	0.0485714	168.12	0.0473358	174.253	0.0502633	172.861	0.0496371	168.74	0.0505267	173.122	0.0506857	172.265	0.0508406	170.176	0.0528881	167.855	0.0534718	170.794	0.054823	173.724	0.05471	171.932	0.05553
Data Range	W31:Z46	172.117	0.05322	183.443	0.0466599	178.333	0.0466793	173.5	0.0466988	168.921	0.0467184	164.577	0.0467379	160.45	0.0467574	167.537	0.0467869	167.537	0.0467044	167.537	0.0468694					173.802	0.0485026	167.754	0.0471533	173.727	0.0501863	172.565	0.0495864	168.388	0.0504567	172.752	0.0506198	171.972	0.0507751	169.818	0.0528123	167.437	0.0534014	170.505	0.0547476	173.351	0.054647	171.566	0.055467
Filled Symbols	FALSE	169.205	0.05526	183.452	0.0466401	178.343	0.0466595	173.509	0.046679	168.93	0.0466985	164.585	0.046718	160.458	0.0467375	168.33	0.0467834	168.33	0.0467009	168.33	0.0468659					173.151	0.0483669	167.45	0.0469227	173.223	0.0500344	172.282	0.0494865	168.051	0.0503186	172.396	0.0504898	171.69	0.0506459	169.475	0.0526628	167.036	0.0532624	170.229	0.0545989	172.993	0.0545227	171.216	0.0553427
ConcAge	FALSE	169.492	0.06031	183.481	0.0466268	178.37	0.0466463	173.536	0.0466657	168.956	0.0466852	164.611	0.0467047	160.483	0.0467242	169.131	0.0467798	169.131	0.0466974	169.131	0.0468623					172.546	0.0481681	167.224	0.0466539	172.753	0.0498117	172.018	0.04934	167.737	0.0501161	172.066	0.0502993	171.429	0.0504566	169.155	0.0524437	166.663	0.0530588	169.972	0.054381	172.66	0.0543405	170.89	0.0551605
ConcSwap	FALSE	173.31	0.06168	183.526	0.0466212	178.414	0.0466407	173.578	0.0466601	168.997	0.0466796	164.651	0.0466991	160.523	0.0467186	169.939	0.0467763	169.939	0.0466939	169.939	0.0468588					172.003	0.0479114	167.083	0.0463587	172.332	0.0495243	171.782	0.049151	167.455	0.0498548	171.769	0.0500534	171.194	0.0502122	168.869	0.0521609	166.328	0.052796	169.741	0.0540997	172.361	0.0541054	170.597	0.0549254
1st Symbol-row	1	172.712	0.06308	183.584	0.0466238	178.47	0.0466432	173.633	0.0466626	169.051	0.0466821	164.703	0.0467016	160.573	0.0467211	170.754	0.0467728	170.754	0.0466904	170.754	0.0468553					171.537	0.047604	167.036	0.04605	171.971	0.0491801	171.579	0.0489245	167.213	0.0495419	171.515	0.0497588	170.992	0.0499195	168.623	0.0518222	166.041	0.0524812	169.543	0.0537629	172.105	0.0538237	170.346	0.0546437
		IsoLine	IsoLine	183.649	0.0466342	178.534	0.0466536	173.695	0.0466731	169.111	0.0466925	164.762	0.046712	160.631	0.0467315	171.578	0.0467693	171.578	0.0466868	171.578	0.0468517					171.16	0.0472542	167.083	0.0457413	171.679	0.0487884	171.415	0.0486669	167.018	0.0491858	171.309	0.0494237	170.829	0.0495865	168.424	0.0514367	165.809	0.052123	169.383	0.0533795	171.898	0.0535032	170.143	0.0543232
				183.718	0.0466516	178.601	0.0466711	173.76	0.0466905	169.175	0.04671	164.824	0.0467295	160.691	0.046749	172.41	0.0467658	172.41	0.0466833	172.41	0.0468482					170.884	0.0468715	167.224	0.0454461	171.465	0.0483599	171.295	0.0483851	166.875	0.0487963	171.158	0.0490571	170.71	0.0492221	168.278	0.0510151	165.639	0.0517312	169.265	0.0529602	171.746	0.0531526	169.995	0.0539726
				183.784	0.0466747	178.665	0.0466942	173.823	0.0467137	169.235	0.0467332	164.883	0.0467527	160.749	0.0467722	173.249	0.0467622	173.249	0.0466798	173.249	0.0468447					170.715	0.0464664	167.45	0.0451773	171.334	0.0479063	171.221	0.0480867	166.787	0.0483839	171.066	0.048669	170.637	0.0488365	168.189	0.0505688	165.535	0.0513164	169.194	0.0525163	171.653	0.0527815	169.904	0.0536015
				183.842	0.0467016	178.721	0.0467211	173.877	0.0467406	169.288	0.0467601	164.935	0.0467796	160.799	0.0467991	174.097	0.0467587	174.097	0.0466763	174.097	0.0468411					170.658	0.04605	167.754	0.0449467	171.29	0.04744	171.196	0.04778	166.758	0.04796	171.035	0.04827	170.612	0.04844	168.159	0.05011	165.5	0.05089	169.169	0.05206	171.622	0.0524	169.873	0.05322
				183.887	0.04673	178.765	0.0467495	173.92	0.0467691	169.33	0.0467886	164.975	0.0468081	160.838	0.0468277	174.953	0.0467552	174.953	0.0466728	174.953	0.0468376					170.715	0.0456336	168.12	0.0447642	171.334	0.0469737	171.221	0.0474733	166.787	0.0475361	171.066	0.047871	170.637	0.0480435	168.189	0.0496512	165.535	0.0504636	169.194	0.0516037	171.653	0.0520185	169.904	0.0528385
				183.915	0.0467578	178.793	0.0467773	173.947	0.0467968	169.356	0.0468164	165.001	0.046836	160.863	0.0468555	175.818	0.0467517	175.818	0.0466693	175.818	0.0468341					170.884	0.0452285	168.535	0.044638	171.465	0.0465201	171.295	0.0471749	166.875	0.0471237	171.158	0.0474829	170.71	0.0476579	168.278	0.0492049	165.639	0.0500488	169.265	0.0511598	171.746	0.0516474	169.995	0.0524674
				183.925	0.0467826	178.802	0.0468021	173.956	0.0468217	169.365	0.0468412	165.01	0.0468608	160.872	0.0468804	176.691	0.0467482	176.691	0.0466658	176.691	0.0468305					171.16	0.0448458	168.978	0.0445734	171.679	0.0460916	171.415	0.0468931	167.018	0.0467342	171.309	0.0471163	170.829	0.0472935	168.424	0.0487833	165.809	0.049657	169.383	0.0507405	171.898	0.0512968	170.143	0.0521168
				ConcTikEll	ConcTikEll	ConcTikEll	ConcTikEll	ConcTikEll	ConcTikEll	ConcTikEll	ConcTikEll	ConcTikEll	ConcTikEll	ConcTikEll	ConcTikEll	177.573	0.0467446	177.573	0.0466623	177.573	0.046827					171.537	0.044496	169.431	0.0445734	171.971	0.0456999	171.579	0.0466355	167.213	0.0463781	171.515	0.0467812	170.992	0.0469605	168.623	0.0483978	166.041	0.0492988	169.543	0.0503571	172.105	0.0509763	170.346	0.0517963
																178.463	0.0467411	178.463	0.0466588	178.463	0.0468235					172.003	0.0441886	169.875	0.044638	172.332	0.0453557	171.782	0.046409	167.455	0.0460652	171.769	0.0464866	171.194	0.0466678	168.869	0.0480591	166.328	0.048984	169.741	0.0500203	172.361	0.0506946	170.597	0.0515146
																179.363	0.0467376	179.363	0.0466553	179.363	0.0468199					172.546	0.0439319	170.289	0.0447642	172.753	0.0450683	172.018	0.04622	167.737	0.0458039	172.066	0.0462407	171.429	0.0464234	169.155	0.0477763	166.663	0.0487212	169.972	0.049739	172.66	0.0504595	170.89	0.0512795
																180.272	0.0467341	180.272	0.0466518	180.272	0.0468164					173.151	0.0437331	170.656	0.0449467	173.223	0.0448456	172.282	0.0460735	168.051	0.0456014	172.396	0.0460502	171.69	0.0462341	169.475	0.0475572	167.036	0.0485176	170.229	0.0495211	172.993	0.0502773	171.216	0.0510973
																181.189	0.0467306	181.189	0.0466483	181.189	0.0468129					173.802	0.0435974	170.959	0.0451773	173.727	0.0446937	172.565	0.0459736	168.388	0.0454633	172.752	0.0459202	171.972	0.0461049	169.818	0.0474077	167.437	0.0483786	170.505	0.0493724	173.351	0.050153	171.566	0.050973
																182.117	0.0467271	182.117	0.0466448	182.117	0.0468093					174.481	0.0435286	171.186	0.0454461	174.253	0.0446167	172.861	0.0459229	168.74	0.0453933	173.122	0.0458543	172.265	0.0460394	170.176	0.0473319	167.855	0.0483082	170.794	0.049297	173.724	0.05009	171.932	0.05091
																183.054	0.0467235	183.054	0.0466413	183.054	0.0468058					175.169	0.0435286	171.326	0.0457413	174.787	0.0446167	173.16	0.0459229	169.097	0.0453933	173.498	0.0458543	172.563	0.0460394	170.539	0.0473319	168.279	0.0483082	171.086	0.049297	174.102	0.05009	172.302	0.05091
																184	0.04672	184	0.0466378	184	0.0468023					175.848	0.0435974	171.373	0.04605	175.313	0.0446937	173.456	0.0459736	169.45	0.0454633	173.869	0.0459202	172.856	0.0461049	170.897	0.0474077	168.698	0.0483786	171.375	0.0493724	174.475	0.050153	172.668	0.050973
																184	0.04672	184	0.0466378	184	0.0468023					176.499	0.0437331			175.818	0.0448456	173.739	0.0460735	169.787	0.0456014	174.224	0.0460502	173.137	0.0462341	171.241	0.0475572	169.099	0.0485176	171.651	0.0495211	174.833	0.0502773	173.018	0.0510973
																IsoLine	IsoLine	ConcBand	ConcBand	ConcBand	ConcBand					177.104	0.0439319			176.287	0.0450683	174.002	0.04622	170.101	0.0458039	174.555	0.0462407	173.399	0.0464234	171.56	0.0477763	169.472	0.0487212	171.909	0.049739	175.166	0.0504595	173.344	0.0512795
																										177.648	0.0441886			176.708	0.0453557	174.239	0.046409	170.383	0.0460652	174.851	0.0464866	173.634	0.0466678	171.847	0.0480591	169.806	0.048984	172.139	0.0500203	175.465	0.0506946	173.637	0.0515146
																										178.114	0.044496			177.069	0.0456999	174.442	0.0466355	170.625	0.0463781	175.106	0.0467812	173.835	0.0469605	172.093	0.0483978	170.093	0.0492988	172.338	0.0503571	175.721	0.0509763	173.888	0.0517963
																										178.49	0.0448458			177.361	0.0460916	174.606	0.0468931	170.82	0.0467342	175.311	0.0471163	173.998	0.0472935	172.291	0.0487833	170.325	0.049657	172.497	0.0507405	175.928	0.0512968	174.091	0.0521168
																										178.767	0.0452285			177.575	0.0465201	174.726	0.0471749	170.963	0.0471237	175.462	0.0474829	174.118	0.0476579	172.437	0.0492049	170.496	0.0500488	172.615	0.0511598	176.08	0.0516474	174.239	0.0524674
																										178.936	0.0456336			177.706	0.0469737	174.8	0.0474733	171.051	0.0475361	175.554	0.047871	174.191	0.0480435	172.526	0.0496512	170.6	0.0504636	172.687	0.0516037	176.173	0.0520185	174.33	0.0528385
																										178.993	0.04605			177.75	0.04744	174.824	0.04778	171.08	0.04796	175.585	0.04827	174.215	0.04844	172.556	0.05011	170.635	0.05089	172.711	0.05206	176.204	0.0524	174.361	0.05322
[truncated: 10 more columns]

## Sheet: PlotDat9
Source sheet	U-Pb plot data	0.3	39.2781	1	38.7	0.5
Plot name	Average9	11.7	39.2781	2	38.7	0.3
Plot Type	15			3	38.8	0.3
1st free col	8			4	38.8	0.4
Sigma Level	1			5	39.2	0.3
Absolute Errs	TRUE			6	39.3	0.3
Symbol Type	1			7	39.4	0.6
Inverse Plot	FALSE			8	39.6	0.3
Color Plot	TRUE			9	39.7	0.3
3D plot	FALSE			10	39.8	0.4
Linear	FALSE			11	39.8	0.3
Data Range	AE49:AF59			IsoLine	IsoLine	IsoLine	IsoLine
Filled Symbols	FALSE
ConcAge	FALSE
ConcSwap	FALSE
1st Symbol-row	1

## Sheet: PlotDat10
Source sheet	U-Pb plot data	166.113	0.04948	173.956	0.0468217	169.365	0.0468412	165.01	0.0468608	160.872	0.0468804	156.936	0.0469	154	0.0468527	154	0.0467699	154	0.0469354	178.568	0.0467407	162.653	0.04	169.457	0.04948	168.203	0.05543	167.921	0.04928	167.639	0.05148	165.563	0.04726	165.695	0.04959	166.761	0.04606	163.935	0.04728	163.796	0.04936	164.319	0.04885	163.132	0.05148	168.755	0.0464129
Plot name	Concordia10	166.113	0.05543	173.947	0.0468415	169.356	0.0468611	165.001	0.0468807	160.863	0.0469003	156.928	0.0469199	154	0.0468527	154	0.0467699	154	0.0469354	173.728	0.0467603	165.493	0.062	169.425	0.0499987	168.183	0.0557652	167.892	0.0496092	167.619	0.0518911	165.541	0.0475044	165.675	0.0499653	166.725	0.0465196	163.913	0.0475219	163.769	0.0496916	164.292	0.0493181	163.111	0.0517194	160.273	0.046452
Plot Type	1	165.837	0.04928	173.92	0.0468548	169.33	0.0468744	164.975	0.046894	160.838	0.0469136	156.903	0.0469333	154.613	0.0468494	154.613	0.0467667	154.613	0.0469322	169.143	0.0467798			169.328	0.0505073	168.122	0.056094	167.808	0.0499293	167.559	0.0522943	165.475	0.0477421	165.617	0.0503333	166.62	0.0469703	163.848	0.0477572	163.688	0.0500142	164.211	0.049777	163.047	0.0519522
1st free col	47	165.563	0.05148	173.877	0.0468604	169.288	0.04688	164.935	0.0468996	160.799	0.0469192	156.865	0.0469389	155.231	0.0468462	155.231	0.0467635	155.231	0.0469289	164.793	0.0467993			169.168	0.0509959	168.022	0.0564098	167.67	0.0502318	167.46	0.0526816	165.367	0.0479666	165.52	0.0506868	166.447	0.0474033	163.742	0.0479794	163.557	0.050319	164.079	0.050218	162.942	0.0521722
Sigma Level	1	163.934	0.04726	173.823	0.0468579	169.235	0.0468775	164.883	0.0468971	160.749	0.0469168	156.816	0.0469364	155.854	0.046843	155.854	0.0467603	155.854	0.0469257	160.661	0.0468189			168.949	0.0514549	167.886	0.0567065	167.481	0.0505083	167.324	0.0530455	165.22	0.0481719	165.387	0.051019	166.209	0.0478101	163.598	0.0481826	163.377	0.0505976	163.898	0.0506323	162.799	0.0523733
Absolute Errs	FALSE	163.666	0.04959	173.76	0.0468474	169.175	0.0468671	164.824	0.0468867	160.691	0.0469063	156.759	0.046926	156.482	0.0468398	156.482	0.0467571	156.482	0.0469225	156.73	0.0468385			168.675	0.0518756	167.714	0.0569784	167.248	0.0507513	167.154	0.0533789	165.037	0.0483523	165.22	0.0513234	165.912	0.0481829	163.419	0.0483612	163.156	0.0508424	163.671	0.0510119	162.622	0.05255
Symbol Type	1	163.132	0.04606	173.695	0.04683	169.111	0.0468496	164.762	0.0468692	160.631	0.0468888	156.701	0.0469085	157.115	0.0468365	157.115	0.0467538	157.115	0.0469192	IsoLine	IsoLine			168.351	0.0522496	167.512	0.0572201	166.977	0.0509542	166.952	0.0536754	164.825	0.0485029	165.024	0.051594	165.56	0.0485144	163.211	0.0485102	162.897	0.0510468	163.403	0.0513494	162.416	0.0526976
Inverse Plot	TRUE	162.338	0.04728	173.633	0.0468068	169.051	0.0468264	164.703	0.046846	160.573	0.0468657	156.645	0.0468853	157.753	0.0468333	157.753	0.0467506	157.753	0.046916					167.983	0.0525697	167.282	0.057427	166.674	0.0511113	166.724	0.0539292	164.589	0.0486196	164.801	0.0518256	165.161	0.048798	162.979	0.0486258	162.609	0.0512052	163.099	0.0516383	162.186	0.0528119
Color Plot	TRUE	161.812	0.04936	173.578	0.0467799	168.997	0.0467995	164.651	0.0468191	160.523	0.0468387	156.595	0.0468583	158.396	0.0468301	158.396	0.0467474	158.396	0.0469127					167.579	0.0528297	167.029	0.057595	166.349	0.0512186	166.473	0.0541352	164.334	0.0486993	164.556	0.0520138	164.723	0.0490284	162.73	0.0487046	162.299	0.0513133	162.764	0.0518729	161.939	0.0528899
3D plot	FALSE	161.551	0.04885	173.536	0.0467514	168.956	0.046771	164.611	0.0467906	160.483	0.0468101	156.557	0.0468297	159.044	0.0468268	159.044	0.0467442	159.044	0.0469095					167.146	0.0530245	166.759	0.0577209	166.01	0.051273	166.205	0.0542896	164.069	0.0487396	164.293	0.0521547	164.253	0.049201	162.47	0.0487445	161.976	0.0513681	162.406	0.0520487	161.681	0.0529294
Linear	FALSE	161.551	0.05148	173.509	0.0467237	168.93	0.0467432	164.585	0.0467627	160.458	0.0467823	156.533	0.0468019	159.698	0.0468236	159.698	0.046741	159.698	0.0469063					166.694	0.0531502	166.476	0.0578022	165.665	0.051273	165.923	0.0543893	163.8	0.0487396	164.018	0.0522457	163.762	0.0493125	162.206	0.0487445	161.649	0.0513681	162.032	0.0521622	161.42	0.0529294
Data Range	W49:Z59	IsoLine	IsoLine	173.5	0.0466988	168.921	0.0467184	164.577	0.0467379	160.45	0.0467574	156.524	0.046777	160.357	0.0468204	160.357	0.0467378	160.357	0.046903					166.23	0.0532046	166.186	0.0578374	165.326	0.0512186	165.635	0.0544324	163.535	0.0486993	163.737	0.052285	163.259	0.0493607	161.946	0.0487046	161.325	0.0513133	161.647	0.0522112	161.163	0.0528899
Filled Symbols	FALSE			173.509	0.046679	168.93	0.0466985	164.585	0.046718	160.458	0.0467375	156.533	0.046757	161.022	0.0468172	161.022	0.0467345	161.022	0.0468998					165.763	0.0531865	165.894	0.0578256	165.001	0.0511113	165.346	0.054418	163.28	0.0486196	163.454	0.0522719	162.753	0.0493446	161.696	0.0486258	161.016	0.0512052	161.262	0.0521948	160.916	0.0528119
ConcAge	FALSE			173.536	0.0466657	168.956	0.0466852	164.611	0.0467047	160.483	0.0467242	156.557	0.0467437	161.692	0.0468139	161.692	0.0467313	161.692	0.0468965					165.304	0.0530962	165.607	0.0577673	164.698	0.0509542	165.061	0.0543465	163.044	0.0485029	163.175	0.0522066	162.254	0.0492646	161.464	0.0485102	160.728	0.0510468	160.881	0.0521134	160.686	0.0526976
ConcSwap	FALSE			173.578	0.0466601	168.997	0.0466796	164.651	0.0466991	160.523	0.0467186	156.595	0.0467381	162.368	0.0468107	162.368	0.0467281	162.368	0.0468933					164.86	0.0529355	165.33	0.0576634	164.427	0.0507513	164.785	0.0542191	162.831	0.0483523	162.906	0.0520903	161.773	0.0491222	161.256	0.0483612	160.469	0.0508424	160.514	0.0519684	160.48	0.05255
1st Symbol-row	1			173.633	0.0466626	169.051	0.0466821	164.703	0.0467016	160.573	0.0467211	156.645	0.0467406	163.049	0.0468075	163.049	0.0467249	163.049	0.0468901					164.441	0.0527076	165.068	0.0575161	164.193	0.0505083	164.525	0.0540384	162.649	0.0481719	162.652	0.0519254	161.318	0.0489202	161.077	0.0481826	160.247	0.0505976	160.167	0.0517627	160.303	0.0523733
				173.695	0.0466731	169.111	0.0466925	164.762	0.046712	160.631	0.0467315	156.701	0.046751	163.736	0.0468043	163.736	0.0467217	163.736	0.0468868					164.054	0.0524168	164.826	0.0573282	164.005	0.0502318	164.285	0.053808	162.502	0.0479666	162.417	0.051715	160.898	0.0486625	160.933	0.0479794	160.068	0.050319	159.847	0.0515003	160.16	0.0521722
				173.76	0.0466905	169.175	0.04671	164.824	0.0467295	160.691	0.046749	156.759	0.0467685	164.429	0.046801	164.429	0.0467185	164.429	0.0468836					163.707	0.0520689	164.609	0.0571033	163.867	0.0499293	164.069	0.0535322	162.394	0.0477421	162.207	0.0514633	160.522	0.0483542	160.827	0.0477572	159.936	0.0500142	159.56	0.0511863	160.055	0.0519522
				173.823	0.0467137	169.235	0.0467332	164.883	0.0467527	160.749	0.0467722	156.816	0.0467917	165.128	0.0467978	165.128	0.0467153	165.128	0.0468803					163.407	0.0516706	164.422	0.0568459	163.783	0.0496092	163.883	0.0532164	162.328	0.0475044	162.025	0.0511751	160.197	0.0480013	160.762	0.0475219	159.856	0.0496916	159.312	0.0508269	159.991	0.0517194
				173.877	0.0467406	169.288	0.0467601	164.935	0.0467796	160.799	0.0467991	156.865	0.0468187	165.833	0.0467946	165.833	0.046712	165.833	0.0468771					163.16	0.0512297	164.267	0.0565609	163.754	0.04928	163.73	0.0528669	162.306	0.04726	161.875	0.050856	159.928	0.0476105	160.741	0.04728	159.829	0.04936	159.107	0.050429	159.969	0.05148
				173.92	0.0467691	169.33	0.0467886	164.975	0.0468081	160.838	0.0468277	156.903	0.0468472	166.544	0.0467914	166.544	0.0467088	166.544	0.0468739					162.97	0.0507547	164.149	0.0562539	163.783	0.0489508	163.612	0.0524904	162.328	0.0470156	161.759	0.0505123	159.722	0.0471896	160.762	0.0470381	159.856	0.0490284	158.95	0.0500003	159.991	0.0512406
				173.947	0.0467968	169.356	0.0468164	165.001	0.046836	160.863	0.0468555	156.928	0.0468751	167.26	0.0467881	167.26	0.0467056	167.26	0.0468706					162.842	0.0502549	164.068	0.0559308	163.867	0.0486307	163.532	0.0520942	162.394	0.0467779	161.681	0.0501507	159.583	0.0467467	160.827	0.0468028	159.936	0.0487058	158.844	0.0495493	160.055	0.0510078
				173.956	0.0468217	169.365	0.0468412	165.01	0.0468608	160.872	0.0468804	156.936	0.0469	167.983	0.0467849	167.983	0.0467024	167.983	0.0468674					162.777	0.04974	164.028	0.055598	164.005	0.0483282	163.492	0.0516861	162.502	0.0465534	161.642	0.0497781	159.512	0.0462904	160.933	0.0465806	160.068	0.048401	158.79	0.0490846	160.16	0.0507878
				ConcTikEll	ConcTikEll	ConcTikEll	ConcTikEll	ConcTikEll	ConcTikEll	ConcTikEll	ConcTikEll	ConcTikEll	ConcTikEll	168.713	0.0467817	168.713	0.0466992	168.713	0.0468642					162.777	0.04922	164.028	0.055262	164.193	0.0480517	163.492	0.0512739	162.649	0.0463481	161.642	0.0494019	159.512	0.0458296	161.077	0.0463774	160.247	0.0481224	158.79	0.0486154	160.303	0.0505867
														169.448	0.0467785	169.448	0.046696	169.448	0.0468609					162.842	0.0487051	164.068	0.0549292	164.427	0.0478087	163.532	0.0508658	162.831	0.0461677	161.681	0.0490293	159.583	0.0453733	161.256	0.0461988	160.469	0.0478776	158.844	0.0481507	160.48	0.05041
														170.19	0.0467752	170.19	0.0466928	170.19	0.0468577					162.97	0.0482053	164.149	0.0546061	164.698	0.0476058	163.612	0.0504696	163.044	0.0460171	161.759	0.0486677	159.722	0.0449304	161.464	0.0460498	160.728	0.0476732	158.95	0.0476997	160.686	0.0502624
														170.939	0.046772	170.939	0.0466896	170.939	0.0468545					163.16	0.0477303	164.267	0.0542991	165.001	0.0474487	163.73	0.0500931	163.28	0.0459004	161.875	0.048324	159.928	0.0445095	161.696	0.0459342	161.016	0.0475148	159.107	0.047271	160.916	0.0501481
														171.694	0.0467688	171.694	0.0466864	171.694	0.0468512					163.407	0.0472894	164.422	0.0540141	165.326	0.0473414	163.883	0.0497436	163.535	0.0458207	162.025	0.0480049	160.197	0.0441187	161.946	0.0458554	161.325	0.0474067	159.312	0.0468731	161.163	0.0500701
														172.456	0.0467656	172.456	0.0466831	172.456	0.046848					163.707	0.0468911	164.609	0.0537567	165.665	0.047287	164.069	0.0494278	163.8	0.0457804	162.207	0.0477167	160.522	0.0437658	162.206	0.0458155	161.649	0.0473519	159.56	0.0465137	161.42	0.0500306
														173.225	0.0467623	173.225	0.0466799	173.225	0.0468448					164.054	0.0465432	164.826	0.0535318	166.01	0.047287	164.285	0.049152	164.069	0.0457804	162.417	0.047465	160.898	0.0434575	162.47	0.0458155	161.976	0.0473519	159.847	0.0461997	161.681	0.0500306
														174	0.0467591	174	0.0466767	174	0.0468415					164.441	0.0462524	165.068	0.0533439	166.349	0.0473414	164.525	0.0489216	164.334	0.0458207	162.652	0.0472546	161.318	0.0431998	162.73	0.0458554	162.299	0.0474067	160.167	0.0459373	161.939	0.0500701
														174	0.0467591	174	0.0466767	174	0.0468415					164.86	0.0460245	165.33	0.0531966	166.674	0.0474487	164.785	0.0487409	164.589	0.0459004	162.906	0.0470897	161.773	0.0429978	162.979	0.0459342	162.609	0.0475148	160.514	0.0457316	162.186	0.0501481
														IsoLine	IsoLine	ConcBand	ConcBand	ConcBand	ConcBand					165.304	0.0458638	165.607	0.0530927	166.977	0.0476058	165.061	0.0486135	164.825	0.0460171	163.175	0.0469734	162.254	0.0428554	163.211	0.0460498	162.897	0.0476732	160.881	0.0455866	162.416	0.0502624
																								165.763	0.0457735	165.894	0.0530344	167.248	0.0478087	165.346	0.048542	165.037	0.0461677	163.454	0.0469081	162.753	0.0427754	163.419	0.0461988	163.156	0.0478776	161.262	0.0455052	162.622	0.05041
																								166.23	0.0457554	166.186	0.0530226	167.481	0.0480517	165.635	0.0485276	165.22	0.0463481	163.737	0.046895	163.259	0.0427593	163.598	0.0463774	163.377	0.0481224	161.647	0.0454888	162.799	0.0505867
																								166.694	0.0458098	166.476	0.0530578	167.67	0.0483282	165.923	0.0485707	165.367	0.0465534	164.018	0.0469343	163.762	0.0428075	163.742	0.0465806	163.557	0.048401	162.032	0.0455378	162.942	0.0507878
																								167.146	0.0459355	166.759	0.0531391	167.808	0.0486307	166.205	0.0486704	165.475	0.0467779	164.293	0.0470253	164.253	0.042919	163.848	0.0468028	163.688	0.0487058	162.406	0.0456513	163.047	0.0510078
																								167.579	0.0461303	167.029	0.053265	167.892	0.0489508	166.473	0.0488248	165.541	0.0470156	164.556	0.0471662	164.723	0.0430916	163.913	0.0470381	163.769	0.0490284	162.764	0.0458271	163.111	0.0512406
																								167.983	0.0463903	167.282	0.053433	167.921	0.04928	166.724	0.0490308	165.563	0.04726	164.801	0.0473544	165.161	0.043322	163.935	0.04728	163.796	0.04936	163.099	0.0460617	163.132	0.05148
																								168.351	0.0467104	167.512	0.0536399			166.952	0.0492846			165.024	0.047586	165.56	0.0436056					163.403	0.0463506
																								168.675	0.0470844	167.714	0.0538816			167.154	0.0495811			165.22	0.0478566	165.912	0.0439371					163.671	0.0466881
																								168.949	0.0475051	167.886	0.0541535			167.324	0.0499145			165.387	0.048161	166.209	0.0443099					163.898	0.0470677
																								169.168	0.0479641	168.022	0.0544502			167.46	0.0502784			165.52	0.0484932	166.447	0.0447167					164.079	0.047482
																								169.328	0.0484527	168.122	0.054766			167.559	0.0506657			165.617	0.0488467	166.62	0.0451497					164.211	0.047923
																								169.425	0.0489613	168.183	0.0550948			167.619	0.0510689			165.675	0.0492147	166.725	0.0456004					164.292	0.0483819
																								169.457	0.04948	168.203	0.05543			167.639	0.05148			165.695	0.04959	166.761	0.04606					164.319	0.04885

## Sheet: PlotDat12
Source sheet	U-Pb plot data	0.3	38.2999	1	36.8	0.5	34	42.6	0.5
Plot name	Average12	35.7	38.2999	2	38	0.3	35	46	1
Plot Type	15			3	36.8	0.4	IsoLine	IsoLine	IsoLine	IsoLine
1st free col	11			4	37.2	0.3
Sigma Level	2			5	38.1	0.3
Absolute Errs	TRUE			6	37.1	0.3
Symbol Type	1			7	37.3	0.3
Inverse Plot	FALSE			8	37.7	0.3
Color Plot	TRUE			9	38.2	0.4
3D plot	FALSE			10	37.6	0.3
Linear	FALSE			11	37	0.3
Data Range	AE31:AF65			12	37.3	0.3
Filled Symbols	FALSE			13	38	0.4
ConcAge	FALSE			14	37.9	0.3
ConcSwap	FALSE			15	37.1	0.3
1st Symbol-row	1			16	37.2	0.3
				17	36.8	0.3
				18	37.1	0.2
				19	38.7	0.5
				20	38.7	0.3
				21	38.8	0.3
				22	38.8	0.4
				23	39.2	0.3
				24	39.3	0.3
				25	39.4	0.6
				26	39.6	0.3
				27	39.7	0.3
				28	39.8	0.4
				29	39.8	0.3
				30	40.3	0.3
				31	40.4	0.3
				32	40.8	0.4
				33	41.6	0.4
				IsoLine	IsoLine	IsoLine	IsoLine

## Sheet: U-Pb plot data
	Table S4- Zircon LA-ICPMS U-Pb ages for the magmatic rocks from SE parts of Kamyaran.
	NORMAL CONCORDIA PLOT CALCULATIONS								NORMAL CONCORDIA PLOT DATA						INVERSE CONCORDIA PLOT CALCULATIONS						INVERSE CONCORDIA PLOT DATA					PROBABILITY DENSITY DATA
Analysis No.	207Pb/235U	1s	RSD	206Pb/238U	1s	RSD	RHO		207Pb/235U	1s	206Pb/238U	1s	RHO		238U/206Pb	RSD	207Pb/206Pb	1s	RSD		238U/206Pb	RSD	207Pb/206Pb	RSD		207Pb/206Pb	1s	206Pb/238U	1s
KH14-39-01	0.03668	0.00082	2.23555	0.00563	3e-05	0.53286	0.238357		0.03668	0.00082	0.00563	3e-05	0.238357		177.62	0.53286	0.04724	0.00109	2.30737		177.62	0.53286	0.04724	2.30737		62	53	36.2	0.2
KH14-39-02	0.03808	0.00097	2.54727	0.00565	4e-05	0.707965	0.277931		0.03808	0.00097	0.00565	4e-05	0.277931		176.991	0.707965	0.04891	0.00129	2.6375		176.991	0.707965	0.04891	2.6375		144	63	36.3	0.3
KH14-39-03	0.04796	0.00053	1.10509	0.00565	3e-05	0.530973	0.480481		0.04796	0.00053	0.00565	3e-05	0.480481		176.991	0.530973	0.06161	0.00074	1.2011		176.991	0.530973	0.06161	1.2011		661	26	36.3	0.2
KH14-39-04	0.03632	0.0012	3.30396	0.00572	9e-05	1.57343	0.476224		0.03632	0.0012	0.00572	9e-05	0.476224		174.825	1.57343	0.04605	0.00167	3.62649		174.825	1.57343	0.04605	3.62649		0	76	36.8	0.5
KH14-39-05	0.0375	0.00072	1.92	0.00591	5e-05	0.846024	0.440637		0.0375	0.00072	0.00591	5e-05	0.440637		169.205	0.846024	0.04605	0.00098	2.12812		169.205	0.846024	0.04605	2.12812		0	42	38	0.3
KH14-39-06	0.03747	0.00142	3.7897	0.00573	7e-05	1.22164	0.322358		0.03747	0.00142	0.00573	7e-05	0.322358		174.52	1.22164	0.04744	0.00187	3.94182		174.52	1.22164	0.04744	3.94182		71	87	36.8	0.4
KH14-39-07	0.03809	0.00094	2.46784	0.00578	4e-05	0.692042	0.280424		0.03809	0.00094	0.00578	4e-05	0.280424		173.01	0.692042	0.04778	0.00123	2.5743		173.01	0.692042	0.04778	2.5743		88	60	37.2	0.3
KH14-39-08	0.03917	0.00135	3.44652	0.00592	5e-05	0.844595	0.245058		0.03917	0.00135	0.00592	5e-05	0.245058		168.919	0.844595	0.04796	0.0017	3.54462		168.919	0.844595	0.04796	3.54462		97	81	38.1	0.3
KH14-39-09	0.03841	0.00123	3.20229	0.00577	5e-05	0.866551	0.270603		0.03841	0.00123	0.00577	5e-05	0.270603		173.31	0.866551	0.04827	0.0016	3.31469		173.31	0.866551	0.04827	3.31469		113	77	37.1	0.3
KH14-39-10	0.03877	0.00124	3.19835	0.0058	4e-05	0.689655	0.215628		0.03877	0.00124	0.0058	4e-05	0.215628		172.414	0.689655	0.04844	0.00159	3.28241		172.414	0.689655	0.04844	3.28241		121	77	37.3	0.3
KH14-39-11	0.04054	0.00144	3.55205	0.00587	5e-05	0.851789	0.239802		0.04054	0.00144	0.00587	5e-05	0.239802		170.358	0.851789	0.05011	0.00184	3.67192		170.358	0.851789	0.05011	3.67192		200	87	37.7	0.3
KH14-39-12	0.04173	0.00135	3.23508	0.00595	6e-05	1.0084	0.311709		0.04173	0.00135	0.00595	6e-05	0.311709		168.067	1.0084	0.05089	0.00171	3.36019		168.067	1.0084	0.05089	3.36019		236	79	38.2	0.4
KH14-39-13	0.04202	0.00144	3.42694	0.00585	4e-05	0.683761	0.199525		0.04202	0.00144	0.00585	4e-05	0.199525		170.94	0.683761	0.05206	0.00183	3.51517		170.94	0.683761	0.05206	3.51517		288	82	37.6	0.3
KH14-39-14	0.04154	0.00116	2.79249	0.00575	5e-05	0.869565	0.311394		0.04154	0.00116	0.00575	5e-05	0.311394		173.913	0.869565	0.0524	0.00153	2.91985		173.913	0.869565	0.0524	2.91985		303	68	37	0.3
KH14-39-15	0.04261	0.00117	2.74583	0.00581	5e-05	0.860585	0.313415		0.04261	0.00117	0.00581	5e-05	0.313415		172.117	0.860585	0.05322	0.00153	2.87486		172.117	0.860585	0.05322	2.87486		338	67	37.3	0.3
KH14-39-16	0.04502	0.00167	3.70946	0.00591	7e-05	1.18443	0.3193		0.04502	0.00167	0.00591	7e-05	0.3193		169.205	1.18443	0.05526	0.00214	3.8726		169.205	1.18443	0.05526	3.8726		423	89	38	0.4
KH14-39-17	0.04905	0.00158	3.2212	0.0059	5e-05	0.847458	0.263087		0.04905	0.00158	0.0059	5e-05	0.263087		169.492	0.847458	0.06031	0.00202	3.34936		169.492	0.847458	0.06031	3.34936		615	74	37.9	0.3
KH14-39-18	0.04907	0.00119	2.42511	0.00577	4e-05	0.693241	0.28586		0.04907	0.00119	0.00577	4e-05	0.28586		173.31	0.693241	0.06168	0.00156	2.52918		173.31	0.693241	0.06168	2.52918		663	56	37.1	0.3
KH14-39-19	0.05033	0.00112	2.22531	0.00579	4e-05	0.690846	0.310449		0.05033	0.00112	0.00579	4e-05	0.310449		172.712	0.690846	0.06308	0.00148	2.34623		172.712	0.690846	0.06308	2.34623		711	51	37.2	0.3
KH14-39-20	0.05258	0.00128	2.43439	0.00573	4e-05	0.69808	0.286758		0.05258	0.00128	0.00573	4e-05	0.286758		174.52	0.69808	0.06659	0.00169	2.53792		174.52	0.69808	0.06659	2.53792		825	54	36.8	0.3
KH14-39-21	0.05306	0.00112	2.11082	0.00578	3e-05	0.519031	0.245891		0.05306	0.00112	0.00578	3e-05	0.245891		173.01	0.519031	0.06659	0.00145	2.1775		173.01	0.519031	0.06659	2.1775		825	47	37.1	0.2
KH14-38-01	0.04107	0.00197	4.79669	0.00602	8e-05	1.3289	0.277046		0.04107	0.00197	0.00602	8e-05	0.277046		166.113	1.3289	0.04948	0.00246	4.97171		166.113	1.3289	0.04948	4.97171		171	115	38.7	0.5
KH14-38-02	0.04599	0.00126	2.73973	0.00602	5e-05	0.830565	0.303156		0.04599	0.00126	0.00602	5e-05	0.303156		166.113	0.830565	0.05543	0.00159	2.86848		166.113	0.830565	0.05543	2.86848		430	65	38.7	0.3
KH14-38-03	0.04098	0.00106	2.58663	0.00603	5e-05	0.829187	0.320567		0.04098	0.00106	0.00603	5e-05	0.320567		165.837	0.829187	0.04928	0.00132	2.67857		165.837	0.829187	0.04928	2.67857		161	64	38.8	0.3
KH14-38-04	0.04288	0.00158	3.6847	0.00604	5e-05	0.827815	0.224663		0.04288	0.00158	0.00604	5e-05	0.224663		165.563	0.827815	0.05148	0.00195	3.78788		165.563	0.827815	0.05148	3.78788		262	89	38.8	0.4
KH14-38-05	0.03977	0.00079	1.98642	0.0061	4e-05	0.655738	0.33011		0.03977	0.00079	0.0061	4e-05	0.33011		163.934	0.655738	0.04726	0.00098	2.07364		163.934	0.655738	0.04726	2.07364		62	48	39.2	0.3
KH14-38-06	0.0418	0.00145	3.4689	0.00611	5e-05	0.818331	0.235905		0.0418	0.00145	0.00611	5e-05	0.235905		163.666	0.818331	0.04959	0.00178	3.58943		163.666	0.818331	0.04959	3.58943		176	85	39.3	0.3
KH14-38-07	0.03891	0.00176	4.52326	0.00613	9e-05	1.46819	0.324587		0.03891	0.00176	0.00613	9e-05	0.324587		163.132	1.46819	0.04606	0.00218	4.73296		163.132	1.46819	0.04606	4.73296		1	101	39.4	0.6
KH14-38-08	0.04016	0.00078	1.94223	0.00616	4e-05	0.649351	0.334332		0.04016	0.00078	0.00616	4e-05	0.334332		162.338	0.649351	0.04728	0.00097	2.05161		162.338	0.649351	0.04728	2.05161		63	48	39.6	0.3
KH14-38-09	0.04204	0.00108	2.56898	0.00618	5e-05	0.809061	0.314935		0.04204	0.00108	0.00618	5e-05	0.314935		161.812	0.809061	0.04936	0.00133	2.69449		161.812	0.809061	0.04936	2.69449		165	64	39.7	0.3
KH14-38-10	0.0417	0.00183	4.38849	0.00619	7e-05	1.13086	0.257687		0.0417	0.00183	0.00619	7e-05	0.257687		161.551	1.13086	0.04885	0.00222	4.54452		161.551	1.13086	0.04885	4.54452		141	104	39.8	0.4
KH14-38-11	0.04391	0.00078	1.77636	0.00619	4e-05	0.646204	0.363779		0.04391	0.00078	0.00619	4e-05	0.363779		161.551	0.646204	0.05148	0.00096	1.8648		161.551	0.646204	0.05148	1.8648		262	44	39.8	0.3
KH14-38-12	0.04443	0.00098	2.20572	0.00627	4e-05	0.637959	0.28923		0.04443	0.00098	0.00627	4e-05	0.28923		159.49	0.637959	0.05137	0.00119	2.31653		159.49	0.637959	0.05137	2.31653		257	54	40.3	0.3
KH14-38-13	0.04591	0.0011	2.39599	0.00628	5e-05	0.796178	0.332296		0.04591	0.0011	0.00628	5e-05	0.332296		159.236	0.796178	0.05305	0.00134	2.52592		159.236	0.796178	0.05305	2.52592		331	59	40.4	0.3
KH14-38-14	0.045	0.00166	3.68889	0.00635	6e-05	0.944882	0.256143		0.045	0.00166	0.00635	6e-05	0.256143		157.48	0.944882	0.05138	0.00196	3.81471		157.48	0.944882	0.05138	3.81471		258	90	40.8	0.4
KH14-38-15	0.10272	0.00456	4.43925	0.00647	7e-05	1.08192	0.243716		0.10272	0.00456	0.00647	7e-05	0.243716		154.56	1.08192	0.11518	0.00525	4.55808		154.56	1.08192	0.11518	4.55808		1883	84	41.6	0.4
KH14-38-16	0.12836	0.00599	4.66656	0.00663	8e-05	1.20664	0.258571		0.12836	0.00599	0.00663	8e-05	0.258571		150.83	1.20664	0.14037	0.00677	4.82297		150.83	1.20664	0.14037	4.82297		2232	86	42.6	0.5
KH14-38-17	0.05139	0.007	13.6213	0.00717	0.0002	2.7894	0.204782		0.05139	0.007	0.00717	0.0002	0.204782		139.47	2.7894	0.05201	0.00722	13.8819		139.47	2.7894	0.05201	13.8819		286	297	46	1

## Sheet: eventsim hidden
1000		6	10	0	669	840
	2	1006	1010	1000	1669	1840	170
		20	26	100	100	100
		11	11	11	11	11	55
		20	20	20	20	20	100
1000		0.209763	0.15675	0.0438837	8.38763e-12	2.09119e-17	1.2685
1010		0.215073	0.168783	0.0436648	1.62934e-11	4.8198e-17	1.32143
1020		0.17174	0.15675	0.0430147	3.13357e-11	1.09982e-16	1.14829
1030		0.106802	0.125557	0.0419527	5.96657e-11	2.48469e-16	0.847873
1040		0.051727	0.0867417	0.0405097	1.12478e-10	5.5575e-16	0.553206
1050		0.019511	0.0516858	0.0387272	2.09927e-10	1.23068e-15	0.339765
1060		0.00573151	0.0265626	0.0366547	3.87904e-10	2.69814e-15	0.213114
1070		0.00131125	0.011774	0.0343479	7.0964e-10	5.85656e-15	0.146612
1080		0.000233629	0.00450125	0.0318661	1.28531e-09	1.25857e-14	0.11313
1090		3.24187e-05	0.00148422	0.0292694	2.30482e-09	2.67775e-14	0.0951568
1100		3.5034e-06	0.000422102	0.0266168	4.09187e-09	5.64053e-14	0.0835856
1110		2.94857e-07	0.000103536	0.0239637	7.19224e-09	1.17632e-13	0.0743907
1120		1.93268e-08	2.19039e-05	0.0213605	1.25159e-08	2.42879e-13	0.0660911
1130		9.86581e-10	3.99676e-06	0.0188505	2.15635e-08	4.9649e-13	0.0582777
1140		3.92223e-11	6.28997e-07	0.01647	3.67818e-08	1.00482e-12	0.0509094
1150		1.21439e-12	8.53777e-08	0.0142469	6.21159e-08	2.01337e-12	0.0440364
1160		2.92828e-14	9.99529e-09	0.0122013	1.03856e-07	3.99406e-12	0.0377134
1170		5.49911e-16	1.00926e-09	0.0103454	1.71915e-07	7.84446e-12	0.0319772
1180		8.04263e-18	8.78949e-11	0.00868452	2.81745e-07	1.52535e-11	0.0268439
1190		9.16073e-20	6.60208e-12	0.00721774	4.57146e-07	2.93651e-11	0.0223108
1200		8.12623e-22	4.27713e-13	0.00593901	7.34362e-07	5.59695e-11	0.0183592
1210		5.61402e-24	2.3899e-14	0.0048382	1.16795e-06	1.05616e-10	0.014958
1220		3.02054e-26	1.15176e-15	0.00390221	1.83905e-06	1.97316e-10	0.012067
1230		1.26568e-28	4.78741e-17	0.00311597	2.86695e-06	3.64967e-10	0.00964006
1240		4.13035e-31	1.7163e-18	0.0024634	4.4249e-06	6.68347e-10	0.00762782
1250		1.04973e-33	5.30692e-20	0.00192811	6.76152e-06	1.21173e-09	0.00598053
1260		2.07775e-36	1.41529e-21	0.00149413	1.02292e-05	2.17505e-09	0.00464983
1270		3.20286e-39	3.25541e-23	0.0011463	1.53213e-05	3.86535e-09	0.00359049
1280		3.8451e-42	6.45832e-25	0.0008707	2.272e-05	6.80088e-09	0.0027615
1290		3.59503e-45	1.10507e-26	0.000654779	3.33563e-05	1.18467e-08	0.002127
1300		2.61773e-48	1.63085e-28	0.000487503	4.84846e-05	2.0431e-08	0.00165675
1310		1.48448e-51	2.07584e-30	0.00035935	6.9773e-05	3.48848e-08	0.00132649
1320		6.55616e-55	2.27892e-32	0.00026225	9.94094e-05	5.89714e-08	0.00111804
1330		2.25502e-58	2.15784e-34	0.000189483	0.000140225	9.86968e-08	0.0010194
1340		6.04058e-62	1.76224e-36	0.000135544	0.00019583	1.63539e-07	0.00102475
1350		1.26018e-65	1.24127e-38	9.59951e-05	0.000270764	2.68286e-07	0.00113445
1360		2.04745e-69	7.54089e-41	6.73092e-05	0.000370646	4.35743e-07	0.00135503
1370		2.59072e-73	3.95125e-43	4.67258e-05	0.000502325	7.00681e-07	0.00169923
1380		2.55302e-77	1.78567e-45	3.21142e-05	0.000674011	1.11549e-06	0.00218602
1390		1.95936e-81	6.96022e-48	2.18521e-05	0.000895379	1.75821e-06	0.00284051
1400		1.17112e-85	2.33992e-50	1.47213e-05	0.00117762	2.74367e-06	0.00369389
1410		5.45146e-90	6.78473e-53	9.81878e-06	0.00153341	4.23887e-06	0.00478307
1420		1.97629e-94	1.69676e-55	6.48374e-06	0.00197682	6.48374e-06	0.00615027
1430		5.57978e-99	3.65985e-58	4.23887e-06	0.00252311	9.81878e-06	0.00784215
1440		1.2269e-103	6.80866e-61	2.74367e-06	0.00318831	1.47213e-05	0.00990877
1450		2.101e-108	1.09248e-63	1.75821e-06	0.00398881	2.18521e-05	0.012402
1460		2.80202e-113	1.5119e-66	1.11549e-06	0.00494062	3.21142e-05	0.0153737
1470		2.91033e-118	1.80463e-69	7.00681e-07	0.00605868	4.67258e-05	0.0188734
1480		2.35418e-123	1.85784e-72	4.35743e-07	0.00735582	6.73092e-05	0.0229456
1490		1.48307e-128	1.64961e-75	2.68286e-07	0.00884181	9.59951e-05	0.0276268
1500		7.27633e-134	1.26332e-78	1.63539e-07	0.0105222	0.000135544	0.0329428
1510		2.78028e-139	8.34444e-82	9.86968e-08	0.0123975	0.000189483	0.0389054
1520		8.27354e-145	4.75376e-85	5.89714e-08	0.0144615	0.00026225	0.04551
1530		1.91744e-150	2.33579e-88	3.48848e-08	0.0167014	0.00035935	0.0527333
1540		3.4608e-156	9.89883e-92	2.0431e-08	0.0190962	0.000487503	0.0605317
1550		4.86472e-162	3.61818e-95	1.18467e-08	0.0216173	0.000654779	0.0688409
1560		5.32557e-168	1.14065e-98	6.80088e-09	0.0242276	0.0008707	0.0775765
1570		4.54047e-174	3.10147e-102	3.86535e-09	0.0268829	0.0011463	0.0866358
1580		3.01482e-180	7.27344e-106	2.17505e-09	0.0295325	0.00149413	0.0959005
1590		1.55901e-186	1.47118e-109	1.21173e-09	0.0321204	0.00192811	0.105241
1600		6.2786e-193	2.56655e-113	6.68347e-10	0.0345875	0.0024634	0.114521
1610		1.96926e-199	3.86177e-117	3.64967e-10	0.0368735	0.00311597	0.123604
1620		4.81027e-206	5.01164e-121	1.97316e-10	0.0389194	0.00390221	0.132358
1630		9.15087e-213	5.60955e-125	1.05616e-10	0.04067	0.0048382	0.140662
1640		1.35576e-219	5.41541e-129	5.59695e-11	0.0420766	0.00593901	0.148412
1650		1.56433e-226	4.5091e-133	2.93651e-11	0.0430987	0.00721774	0.155523
1660		1.40572e-233	3.2382e-137	1.52535e-11	0.0437063	0.00868452	0.161935
1670		9.8378e-241	2.00573e-141	7.84446e-12	0.0438815	0.0103454	0.16761
1680		5.36195e-248	1.07151e-145	3.99406e-12	0.043619	0.0122013	0.172535
1690		2.27601e-255	4.93716e-150	2.01337e-12	0.0429266	0.0142469	0.176718
1700		7.52405e-263	1.96206e-154	1.00482e-12	0.0418249	0.01647	0.180184
1710		1.93711e-270	6.72515e-159	4.9649e-13	0.040346	0.0188505	0.182971
1720		3.88406e-278	1.98814e-163	2.42879e-13	0.0385321	0.0213605	0.185122
1730		6.06516e-286	5.0693e-168	1.17632e-13	0.0364336	0.0239637	0.186683
1740		7.37608e-294	1.11482e-172	5.64053e-14	0.0341066	0.0266168	0.187691
1750		6.9861e-302	2.11454e-177	2.67775e-14	0.0316106	0.0292694	0.188174
1760		0	3.45925e-182	1.25857e-14	0.0290057	0.0318661	0.188149
1770		0	4.88094e-187	5.85656e-15	0.0263506	0.0343479	0.187614
1780		0	5.93992e-192	2.69814e-15	0.0237004	0.0366547	0.186552
1790		0	6.23466e-197	1.23068e-15	0.0211046	0.0387272	0.184935
1800		0	5.64417e-202	5.5575e-16	0.0186061	0.0405097	0.182722
1810		0	4.407e-207	2.48469e-16	0.0162402	0.0419527	0.179869
1820		0	2.96784e-212	1.09982e-16	0.0140341	0.0430147	0.176333
1830		0	1.72383e-217	4.8198e-17	0.012007	0.0436648	0.172076
1840		0	8.6358e-223	2.09119e-17	0.0101705	0.0438837	0.167076
1850		0	3.73135e-228	8.98286e-18	0.00852917	0.0436648	0.161327
1860		0	1.39054e-233	3.82026e-18	0.00708154	0.0430147	0.154843
1870		0	4.4695e-239	1.60853e-18	0.00582112	0.0419527	0.147664
1880		0	1.23905e-244	6.70533e-19	0.00473742	0.0405097	0.139855
1890		0	2.9626e-250	2.76739e-19	0.0038171	0.0387272	0.131501
1900		0	6.10961e-256	1.13078e-19	0.00304497	0.0366547	0.122708
1910		0	1.0867e-261	4.57446e-20	0.00240486	0.0343479	0.1136
1920		0	1.66709e-267	1.83215e-20	0.00188041	0.0318661	0.104307
1930		0	2.20579e-273	7.26504e-21	0.00145571	0.0292694	0.0949684
1940		0	2.51725e-279	2.85215e-21	0.00111571	0.0266168	0.0857186
1950		0	2.47766e-285	1.10857e-21	0.000846616	0.0239637	0.0766866
1960		0	2.10336e-291	4.26592e-22	0.000636031	0.0213605	0.0679892
1970		0	1.54007e-297	1.62525e-22	0.000473072	0.0188505	0.0597275
1980		0	9.72574e-304	6.1303e-23	0.000348364	0.01647	0.0519841
1990		0	0	2.28929e-23	0.000253978	0.0142469	0.044821
2000		0	0	8.46406e-24	0.000183323	0.0122013	0.0382797
2010		0	0	3.09822e-24	0.000131007	0.0103454	0.0323816
2020		0	0	1.1228e-24	9.26888e-05	0.00868452	0.0271295
2030		0	0	4.02858e-25	6.49259e-05	0.00721774	0.0225101
2040		0	0	1.43106e-25	4.50263e-05	0.00593901	0.0184961
2050		0	0	5.03291e-26	3.09152e-05	0.0048382	0.01505
2060		0	0	1.75242e-26	2.10152e-05	0.00390221	0.0121263
2070		0	0	6.04109e-27	1.41434e-05	0.00311597	0.00967491
2080		0	0	2.06181e-27	9.42388e-06	0.0024634	0.00764327
2090		0	0	6.96689e-28	6.21675e-06	0.00192811	0.00597884
2100		0	0	2.3307e-28	4.06026e-06	0.00149413	0.00463076
2110		0	0	7.71954e-29	2.62544e-06	0.0011463	0.00355123
2120		0	0	2.53135e-29	1.68076e-06	0.0008707	0.00269645
2130		0	0	8.2181e-30	1.06529e-06	0.000654779	0.00202715
2140		0	0	2.64148e-30	6.68477e-07	0.000487503	0.00150889
2150		0	0	8.40582e-31	4.15301e-07	0.00035935	0.001112
2160		0	0	2.64832e-31	2.55444e-07	0.00026225	0.00081138
2170		0	0	8.2607e-32	1.55555e-07	0.000189483	0.000586154
2180		0	0	2.55106e-32	9.37848e-08	0.000135544	0.000419244
2190		0	0	7.79977e-33	5.59804e-08	9.59951e-05	0.000296885
2200		0	0	2.36102e-33	3.30824e-08	6.73092e-05	0.000208149
2210		0	0	7.07579e-34	1.9356e-08	4.67258e-05	0.000144485
2220		0	0	2.09946e-34	1.12122e-08	3.21142e-05	9.92966e-05
2230		0	0	6.16732e-35	6.43018e-09	2.18521e-05	6.75627e-05
2240		0	0	1.79367e-35	3.651e-09	1.47213e-05	4.55136e-05
2250		0	0	5.16471e-36	2.05238e-09	9.81878e-06	3.03553e-05
2260		0	0	1.47234e-36	1.14225e-09	6.48374e-06	2.00442e-05
2270		0	0	4.15551e-37	6.29394e-10	4.23887e-06	1.31039e-05
2280		0	0	1.16118e-37	3.43353e-10	2.74367e-06	8.4815e-06
2290		0	0	3.21241e-38	1.85445e-10	1.75821e-06	5.43505e-06
2300		0	0	8.79871e-39	9.91623e-11	1.11549e-06	3.4482e-06
2310		0	0	2.38597e-39	5.24971e-11	7.00681e-07	2.1659e-06
2320		0	0	6.40571e-40	2.75157e-11	4.35743e-07	1.34693e-06
2330		0	0	1.70266e-40	1.42785e-11	2.68286e-07	8.29291e-07
2340		0	0	4.48068e-41	7.33574e-12	1.63539e-07	5.05507e-07
2350		0	0	1.1674e-41	3.7313e-12	9.86968e-08	3.05074e-07
2360		0	0	3.01127e-42	1.87903e-12	5.89714e-08	1.82281e-07
2370		0	0	7.69019e-43	9.3684e-13	3.48848e-08	1.07829e-07
2380		0	0	1.94438e-43	4.62438e-13	2.0431e-08	6.31517e-08
2390		0	0	4.86726e-44	2.25995e-13	1.18467e-08	3.66179e-08
2400		0	0	1.20627e-44	1.09346e-13	6.80088e-09	2.10212e-08
2410		0	0	2.95978e-45	5.23794e-14	3.86535e-09	1.19476e-08
2420		0	0	7.19007e-46	2.48414e-14	2.17505e-09	6.72296e-09
2430		0	0	1.72927e-46	1.16641e-14	1.21173e-09	3.7454e-09
2440		0	0	4.11766e-47	5.42226e-15	6.68347e-10	2.06582e-09
2450		0	0	9.70723e-48	2.49556e-15	3.64967e-10	1.12809e-09
2460		0	0	2.26567e-48	1.13714e-15	1.97316e-10	6.0989e-10
2470		0	0	5.23547e-49	5.12996e-16	1.05616e-10	3.2645e-10
2480		0	0	1.19776e-49	2.29125e-16	5.59695e-11	1.72997e-10
2490		0	0	2.71296e-50	1.01318e-16	2.93651e-11	9.07652e-11
2500		0	0	6.08378e-51	4.43569e-17	1.52535e-11	4.71473e-11
		0.781929	0.791141	0.571942	1.1	1.1	8.69003

## Sheet: Hf orig. equations hidden
Hf model ages
	decay constant	176Hf/177Hf)sample	176Lu/177Hf)sample	176Hf/177Hf)CHUR	176Lu/177Hf)CHUR	T(CHUR)
CHUR	0.0193	0.28245	0.015	0.282772	0.0332	0.908685
DM	decay constant	176Hf/177Hf)sample	176Lu/177Hf)sample	176Hf/177Hf)DM	176Lu/177Hf)DM	T(DM)
	0.0193	0.28245	0.015	0.283251	0.0384	1.74393		Scherer et al., 2001 - 176Lu decay constant (1.865x10-11)
								initial Hf vs age plot
								Age	CHUR	Depleted Mantle
Hf Evolution curve - CHUR								0	0.282772	0.283251
								500	0.282461	0.282891
	decay constant	176Hf/177Hf)I	176Lu/177Hf)CHUR	time (Ga) from present	176Hf/177Hf)t			1000	0.282147	0.282528
	0.0193	0.282772	0.0332	0.12	0.282695			1500	0.28183	0.282162
								2000	0.28151	0.281792
Hf Evolution curve - CHUR								2500	0.281187	0.281418
								3000	0.280862	0.281041
	decay constant	176Hf/177Hf)I	176Lu/177Hf)CHUR	time (Ga) from present	176Hf/177Hf)t			3500	0.280533	0.280661
	0.0193	0.282772	0.0332	3.5	0.280452			4000	0.280201	0.280277
								4500	0.279865	0.279889
Hf Evolution curve --DM
								EHf vs age plot
	decay constant	176Hf/177Hf)I	176Lu/177Hf)DM	time (Ga) from present	176Hf/177Hf)t			Age	CHUR	Depleted Mantle
	0.0193	0.283251	0.0384	3.5	0.280567			0	0	16.9394
								500	0	15.2334
Hf Evolution curve -sample (back from present)								1000	0	13.5075
								1500	0	11.7616
	decay constant	176Hf/177Hf)sample	176Lu/177Hf)sample	time back from present	176Hf/177Hf)sample (t)			2000	0	9.99528
	0.0193	0.280567	0.0001	3.5	0.28056			2500	0	8.20837
								3000	0	6.40056
Epsilon Hf		epsilon(t)						3500	0	4.57155
		3.85636						4000	0	2.72105
								4500	0	0.848762
Age	Depleted mantle	CHUR
0	0.282772	0.283251
500	0.282461	0.282891
1000	0.282147	0.282528
1500	0.28183	0.282162
2000	0.28151	0.281792
2500	0.281187	0.281418
3000	0.280862	0.281041
3500	0.280533	0.280661
4000	0.280201	0.280277
4500	0.279865	0.279889

[truncated: 1 more sheets: Hf points, etc hidden]
